# Supplementary material for: Harvesting Evolutionary Signals in a Forest of Prokaryotic Gene Trees
Source: Oxford University Press journal article supplement (doi:10.1093/molbev/msq323), 2010-12-20
Supplement: msq323_Supplementary_Data.zip [file msq323_Supplementary_Data.zip]

Archive with 7 entries (7 files):
- mbe-10-0656-File012.pdf
- mbe-10-0656-File011.pdf
- mbe-10-0656-File008.xls
- mbe-10-0656-File013.txt
- mbe-10-0656-File007.doc
- mbe-10-0656-File010.xls
- mbe-10-0656-File009.pdf
