# Supplementary material for: Harvesting Evolutionary Signals in a Forest of Prokaryotic Gene Trees
Source: Oxford University Press journal article supplement (doi:10.1093/molbev/msq323), 2010-12-20
Supplement: msq323_Supplementary_Data.zip [file msq323_Supplementary_Data.zip › mbe-10-0656-File008.xls]

## Sheet: Feuil1
Taxa	number of genes	nt	Organism	Anaerobe	Aerobe	Hyperthermophile	Thermophile	Mesophile	Host	Soil	Aquatic	GC	Archaea	Crenarchaeota	Euryarchaeota	Cyanobacteria	Firmicutes	Planctomycetes	Proteobacteria	Beta.proteobacteria	site
Censy	2066	2045086	Cenarchaeum symbiosum	?	?	0	0	0	1	0	1	1	1	1	0	0	0	0	0	0	http://www.ncbi.nlm.nih.gov/sites/entrez?Db=genome&Cmd=ShowDetailView&TermToSearch=23436
Aerpe	1752	1669696	Aeropyrum pernix	0	1	1	1	0	0	0	1	1	1	1	0	0	0	0	0	0	http://www.ncbi.nlm.nih.gov/sites/entrez?Db=genome&Cmd=ShowDetailView&TermToSearch=142
Hypbu	1673	1667163	Hyperthermus butylicus	1	0	1	1	0	0	0	1	1	1	1	0	0	0	0	0	0	http://www.ncbi.nlm.nih.gov/sites/entrez?Db=genome&Cmd=ShowDetailView&TermToSearch=20309
Stama	1655	1570485	Staphylothermus marinus F1	?	?	1	1	0	0	0	1	0	1	1	0	0	0	0	0	0	http://www.ncbi.nlm.nih.gov/sites/entrez?Db=genome&Cmd=ShowDetailView&TermToSearch=20523
Sulac	2330	2225959	Sulfolobus acidocaldarius DSM 639	0	1	0	1	0	0	0	1	0	1	1	0	0	0	0	0	0	http://www.ncbi.nlm.nih.gov/sites/entrez?Db=genome&Cmd=ShowDetailView&TermToSearch=18499
Sulso	3034	2992245	Sulfolobus solfataricus	0	1	1	1	0	0	0	1	0	1	1	0	0	0	0	0	0	http://www.ncbi.nlm.nih.gov/sites/entrez?Db=genome&Cmd=ShowDetailView&TermToSearch=180
Sulto	2875	2694756	Sulfolobus tokodaii	0	1	1	1	0	0	0	1	0	1	1	0	0	0	0	0	0	http://www.ncbi.nlm.nih.gov/sites/entrez?Db=genome&Cmd=ShowDetailView&TermToSearch=200
Calma	2048	2077567	Caldivirga maquilingensis IC-167	0	1	1	1	0	0	0	1	0	1	1	0	0	0	0	0	0	http://www.ncbi.nlm.nih.gov/sites/entrez?Db=genome&Cmd=ShowDetailView&TermToSearch=21540
Pyrae	2705	2222430	Pyrobaculum aerophilum	0	1	1	1	0	0	0	1	1	1	1	0	0	0	0	0	0	http://www.ncbi.nlm.nih.gov/sites/entrez?Db=genome&Cmd=ShowDetailView&TermToSearch=227
Pyrca	2226	2009313	Pyrobaculum calidifontis JCM 11548	0	1	1	1	0	0	0	1	1	1	1	0	0	0	0	0	0	http://www.ncbi.nlm.nih.gov/sites/entrez?Db=genome&Cmd=ShowDetailView&TermToSearch=20565
Pyris	2063	1826402	Pyrobaculum islandicum DSM 4184	?	?	1	1	0	0	0	1	0	1	1	0	0	0	0	0	0	http://www.ncbi.nlm.nih.gov/sites/entrez?Db=genome&Cmd=ShowDetailView&TermToSearch=20192
Thepe	1895	1781889	Thermofilum pendens Hrk 5	1	0	0	1	0	0	0	1	1	1	1	0	0	0	0	0	0	http://www.ncbi.nlm.nih.gov/sites/entrez?Db=genome&Cmd=ShowDetailView&TermToSearch=20189
Thete	2060	1769823	Thermoproteus tenax	?	?	?	?	?	0	0	0	?	1	1	0	0	0	0	0	0	http://www.ncbi.nlm.nih.gov/sites/entrez?Db=genome&Cmd=ShowDetailView&TermToSearch=22120
Uncme	3170	3179916	Uncultured methanogenic archaeon	?	?	?	?	?	0	0	0	?	1	0	1	0	0	0	0	0	http://www.ncbi.nlm.nih.gov/sites/entrez?Db=genome&Cmd=ShowDetailView&TermToSearch=20979
Arcfu	2486	2178400	Archaeoglobus fulgidus	1	0	1	1	0	0	0	1	0	1	0	1	0	0	0	0	0	http://www.ncbi.nlm.nih.gov/sites/entrez?Db=genome&Cmd=ShowDetailView&TermToSearch=131
Halma	3189	3131724	Haloarcula marismortui ATCC 43049	0	1	?	?	?	0	0	1	1	1	0	1	0	0	0	0	0	http://www.ncbi.nlm.nih.gov/sites/entrez?Db=genome&Cmd=ShowDetailView&TermToSearch=515
Halsp	2127	2014239	Halobacterium sp	0	1	?	?	?	0	0	1	1	1	0	1	0	0	0	0	0	http://www.ncbi.nlm.nih.gov/sites/entrez?Db=genome&Cmd=ShowDetailView&TermToSearch=165
Halwa	2875	3132494	Haloquadratum walsbyi	?	?	?	?	?	0	0	1	0	1	0	1	0	0	0	0	0	http://www.ncbi.nlm.nih.gov/sites/entrez?Db=genome&Cmd=ShowDetailView&TermToSearch=19634
Natph	2724	2595221	Natronomonas pharaonis	0	1	?	?	?	0	0	1	1	1	0	1	0	0	0	0	0	http://www.ncbi.nlm.nih.gov/sites/entrez?Db=genome&Cmd=ShowDetailView&TermToSearch=18776
Metth	1921	1751377	Methanobacterium thermoautotrophicum	1	0	0	1	0	0	0	0	0	1	0	1	0	0	0	0	0	http://www.ncbi.nlm.nih.gov/sites/entrez?Db=genome&Cmd=ShowDetailView&TermToSearch=130
Metst	1591	1767403	Methanosphaera stadtmanae	1	0	?	?	?	1	0	0	0	1	0	1	0	0	0	0	0	http://www.ncbi.nlm.nih.gov/sites/entrez?Db=genome&Cmd=ShowDetailView&TermToSearch=19097
Metja	1765	1664970	Methanococcus jannaschii	1	0	1	1	0	0	0	1	0	1	0	1	0	0	0	0	0	http://www.ncbi.nlm.nih.gov/sites/entrez?Db=genome&Cmd=ShowDetailView&TermToSearch=28
MetmC	1880	1780761	Methanococcus maripaludis C5	1	0	?	?	?	0	0	1	0	1	0	1	0	0	0	0	0	http://www.ncbi.nlm.nih.gov/sites/entrez?Db=genome&Cmd=ShowDetailView&TermToSearch=20631
Metmp	1772	1661137	Methanococcus maripaludis S2	1	0	?	?	?	0	0	1	0	1	0	1	0	0	0	0	0	http://www.ncbi.nlm.nih.gov/sites/entrez?Db=genome&Cmd=ShowDetailView&TermToSearch=394
Metla	1822	1804962	Methanocorpusculum labreanum Z	1	0	0	0	1	0	0	1	1	1	0	1	0	0	0	0	0	http://www.ncbi.nlm.nih.gov/sites/entrez?Db=genome&Cmd=ShowDetailView&TermToSearch=20434
Metcu	2557	2478101	Methanoculleus marisnigri JR1	1	0	?	?	?	0	0	1	1	1	0	1	0	0	0	0	0	http://www.ncbi.nlm.nih.gov/sites/entrez?Db=genome&Cmd=ShowDetailView&TermToSearch=20541
Methu	3304	3544738	Methanospirillum hungatei JF-1	1	0	?	?	?	0	1	0	0	1	0	1	0	0	0	0	0	http://www.ncbi.nlm.nih.gov/sites/entrez?Db=genome&Cmd=ShowDetailView&TermToSearch=19214
Metka	1729	1694969	Methanopyrus kandleri	1	0	1	0	0	0	0	1	1	1	0	1	0	0	0	0	0	http://www.ncbi.nlm.nih.gov/sites/entrez?Db=genome&Cmd=ShowDetailView&TermToSearch=235
Metbu	2497	2575032	Methanococcoides burtonii DSM 6242	1	0	0	0	0	0	0	1	0	1	0	1	0	0	0	0	0	http://www.ncbi.nlm.nih.gov/sites/entrez?Db=genome&Cmd=ShowDetailView&TermToSearch=19374
Metsa	1784	1879471	Methanosaeta thermophila PT	1	0	0	1	0	0	1	1	1	1	0	1	0	0	0	0	0	http://www.ncbi.nlm.nih.gov/sites/entrez?Db=genome&Cmd=ShowDetailView&TermToSearch=20043
Metac	4721	5751492	Methanosarcina acetivorans	1	0	?	?	?	0	0	1	0	1	0	1	0	0	0	0	0	http://www.ncbi.nlm.nih.gov/sites/entrez?Db=genome&Cmd=ShowDetailView&TermToSearch=236
Metba	3811	4837408	Methanosarcina barkeri fusaro	1	0	?	?	?	0	1	0	0	1	0	1	0	0	0	0	0	http://www.ncbi.nlm.nih.gov/sites/entrez?Db=genome&Cmd=ShowDetailView&TermToSearch=18678
Metma	3434	4096345	Methanosarcina mazei	1	0	?	?	?	0	1	0	0	1	0	1	0	0	0	0	0	http://www.ncbi.nlm.nih.gov/sites/entrez?Db=genome&Cmd=ShowDetailView&TermToSearch=239
Pyrab	1876	1765118	Pyrococcus abyssi	1	0	1	1	0	0	0	1	0	1	0	1	0	0	0	0	0	http://www.ncbi.nlm.nih.gov/sites/entrez?Db=genome&Cmd=ShowDetailView&TermToSearch=143
Pyrfu	2228	1908256	Pyrococcus furiosus	1	0	1	1	0	0	0	1	0	1	0	1	0	0	0	0	0	http://www.ncbi.nlm.nih.gov/sites/entrez?Db=genome&Cmd=ShowDetailView&TermToSearch=228
Pyrho	2005	1738505	Pyrococcus horikoshii	1	0	1	1	0	0	0	1	0	1	0	1	0	0	0	0	0	http://www.ncbi.nlm.nih.gov/sites/entrez?Db=genome&Cmd=ShowDetailView&TermToSearch=134
Theko	2358	2088737	Thermococcus kodakaraensis KOD1	1	0	1	1	0	0	0	1	1	1	0	1	0	0	0	0	0	http://www.ncbi.nlm.nih.gov/sites/entrez?Db=genome&Cmd=ShowDetailView&TermToSearch=609
Picto	1587	1545895	Picrophilus torridus DSM 9790	0	1	0	1	0	0	1	0	0	1	0	1	0	0	0	0	0	http://www.ncbi.nlm.nih.gov/sites/entrez?Db=genome&Cmd=ShowDetailView&TermToSearch=404
Theac	1532	1564906	Thermoplasma acidophilum	?	?	0	1	0	0	0	0	0	1	0	1	0	0	0	0	0	http://www.ncbi.nlm.nih.gov/sites/entrez?Db=genome&Cmd=ShowDetailView&TermToSearch=168
Thevo	1550	1584804	Thermoplasma volcanium	?	?	?	1	?	0	0	1	0	1	0	1	0	0	0	0	0	http://www.ncbi.nlm.nih.gov/sites/entrez?Db=genome&Cmd=ShowDetailView&TermToSearch=175
Naneq	586	490885	Nanoarchaeum equitans	1	0	1	1	0	0	0	1	0	1	0	0	0	0	0	0	0	http://www.ncbi.nlm.nih.gov/sites/entrez?Db=genome&Cmd=ShowDetailView&TermToSearch=376
Aciba01Bi	4834	5650368	Acidobacteria bacterium Ellin345	0	1	0	0	1	0	1	0	1	0	0	0	0	0	0	0	0	http://www.ncbi.nlm.nih.gov/sites/entrez?Db=genome&Cmd=ShowDetailView&TermToSearch=19428
Solus01Bi	8002	9965640	Solibacter usitatus Ellin6076	0	1	0	0	1	0	1	0	1	0	0	0	0	0	0	0	0	http://www.ncbi.nlm.nih.gov/sites/entrez?Db=genome&Cmd=ShowDetailView&TermToSearch=20026
Myctu01Ba	4047	4411532	Mycobacterium tuberculosis H37Rv	0	1	?	?	?	1	0	0	1	0	0	0	0	0	0	0	0	http://www.ncbi.nlm.nih.gov/sites/entrez?Db=genome&Cmd=ShowDetailView&TermToSearch=135
Biflo01Ba	1798	2256640	Bifidobacterium longum NCC2705	1	0	?	?	?	1	0	0	1	0	0	0	0	0	0	0	0	http://www.ncbi.nlm.nih.gov/sites/entrez?Db=genome&Cmd=ShowDetailView&TermToSearch=254
Rubxy01Ba	3281	3225748	Rubrobacter xylanophilus DSM 9941	0	1	0	1	0	0	0	1	1	0	0	0	0	0	0	0	0	http://www.ncbi.nlm.nih.gov/sites/entrez?Db=genome&Cmd=ShowDetailView&TermToSearch=19570
Aquae01Bq	1580	1551335	Aquifex aeolicus VF5	0	1	1	0	0	0	0	1	0	0	0	0	0	0	0	0	0	http://www.ncbi.nlm.nih.gov/sites/entrez?Db=genome&Cmd=ShowDetailView&TermToSearch=133
Bacth01Bb	4864	6260361	Bacteroides thetaiotaomicron VPI-5482	1	0	?	?	?	1	0	0	0	0	0	0	0	0	0	0	0	http://www.ncbi.nlm.nih.gov/sites/entrez?Db=genome&Cmd=ShowDetailView&TermToSearch=291
Flajo01Bb	5137	6096872	Flavobacterium johnsoniae UW101	0	1	?	?	?	0	1	1	0	0	0	0	0	0	0	0	0	http://www.ncbi.nlm.nih.gov/sites/entrez?Db=genome&Cmd=ShowDetailView&TermToSearch=20956
Cythu01Bb	3837	4433218	Cytophaga hutchinsonii ATCC 33406	0	1	?	?	?	0	1	1	0	0	0	0	0	0	0	0	0	http://www.ncbi.nlm.nih.gov/sites/entrez?Db=genome&Cmd=ShowDetailView&TermToSearch=19678
CanPr01Bv	2075	2414465	Candidatus Protochlamydia amoebophila UWE25	?	?	0	0	1	1	0	0	0	0	0	0	0	0	0	0	0	http://www.ncbi.nlm.nih.gov/sites/entrez?Db=genome&Cmd=ShowDetailView&TermToSearch=399
Chltr01Bv	936	1044352	Chlamydia trachomatis D/UW-3/CX	?	?	?	?	?	1	0	0	0	0	0	0	0	0	0	0	0	http://www.ncbi.nlm.nih.gov/sites/entrez?Db=genome&Cmd=ShowDetailView&TermToSearch=24495
Chlpn01Bv	1167	1229853	Chlamydophila pneumoniae AR39	?	?	0	0	1	1	0	0	0	0	0	0	0	0	0	0	0	http://www.ncbi.nlm.nih.gov/sites/entrez?Db=genome&Cmd=ShowDetailView&TermToSearch=154
Chlte01Bb	2337	2154946	Chlorobium tepidum TLS	1	0	0	1	0	0	0	1	1	0	0	0	0	0	0	0	0	http://www.ncbi.nlm.nih.gov/sites/entrez?Db=genome&Cmd=ShowDetailView&TermToSearch=247
Provi01Bb	1824	1966858	Prosthecochloris vibrioformis DSM 265	0	0	0	0	1	0	0	1	1	0	0	0	0	0	0	0	0	http://www.ncbi.nlm.nih.gov/sites/entrez?Db=genome&Cmd=ShowDetailView&TermToSearch=20852
Chlau01Bh	3990	5258541	Chloroflexus aurantiacus J-10-fl	1	0	0	1	0	0	0	1	1	0	0	0	0	0	0	0	0	http://www.ncbi.nlm.nih.gov/sites/entrez?Db=genome&Cmd=ShowDetailView&TermToSearch=21763
Dehsp01Bh	1436	1341892	Dehalococcoides sp BAV1	1	0	?	?	?	0	0	0	0	0	0	0	0	0	0	0	0	http://www.ncbi.nlm.nih.gov/sites/entrez?Db=genome&Cmd=ShowDetailView&TermToSearch=20970
Synsp01Bc	3229	3573470	Synechocystis sp PCC 6803	?	?	?	?	?	0	0	1	0	0	0	0	1	0	0	0	0	http://www.ncbi.nlm.nih.gov/sites/entrez?Db=genome&Cmd=ShowDetailView&TermToSearch=112
Theel01Bc	2525	2593857	Thermosynechococcus elongatus BP-1	?	?	?	1	?	0	0	1	1	0	0	0	1	0	0	0	0	http://www.ncbi.nlm.nih.gov/sites/entrez?Db=genome&Cmd=ShowDetailView&TermToSearch=251
Glovi01Bc	4482	4659019	Gloeobacter violaceus PCC 7421	?	?	?	?	?	0	1	1	1	0	0	0	1	0	0	0	0	http://www.ncbi.nlm.nih.gov/sites/entrez?Db=genome&Cmd=ShowDetailView&TermToSearch=346
Anava01Bc	5134	6365727	Anabaena variabilis ATCC 29413	0	1	?	?	?	0	1	1	0	0	0	0	1	0	0	0	0	http://www.ncbi.nlm.nih.gov/sites/entrez?Db=genome&Cmd=ShowDetailView&TermToSearch=18763
Nossp01Bc	5430	6413771	Nostoc sp PCC 7120	0	1	?	?	?	0	1	0	0	0	0	0	1	0	0	0	0	http://www.ncbi.nlm.nih.gov/sites/entrez?Db=genome&Cmd=ShowDetailView&TermToSearch=217
Trier01Bc	5126	7750108	Trichodesmium erythraeum IMS101	0	1	?	?	?	0	0	1	0	0	0	0	1	0	0	0	0	http://www.ncbi.nlm.nih.gov/sites/entrez?Db=genome&Cmd=ShowDetailView&TermToSearch=19735
Proma01Bc	1930	1751080	Prochlorococcus marinus subsp marinus str CCMP1375	?	?	0	0	1	0	0	1	0	0	0	0	1	0	0	0	0	http://www.ncbi.nlm.nih.gov/sites/entrez?Db=genome&Cmd=ShowDetailView&TermToSearch=310
Acama01Bc	6396	6503724	Acaryochloris marina MBIC11017	0	1	?	?	?	0	0	1	0	0	0	0	1	0	0	0	0	http://www.ncbi.nlm.nih.gov/sites/entrez?Db=genome&Cmd=ShowDetailView&TermToSearch=21511
Deira01Bd	2687	2648638	Deinococcus radiodurans R1	0	1	?	?	?	0	1	0	1	0	0	0	0	0	0	0	0	http://www.ncbi.nlm.nih.gov/sites/entrez?Db=genome&Cmd=ShowDetailView&TermToSearch=144
Theth01Bd	2035	1894877	Thermus thermophilus HB27	0	1	0	1	0	0	0	1	1	0	0	0	0	0	0	0	0	http://www.ncbi.nlm.nih.gov/sites/entrez?Db=genome&Cmd=ShowDetailView&TermToSearch=398
Bacsu01Bf	4422	4215606	Bacillus subtilis subsp subtilis str 168	?	?	?	?	?	0	1	0	0	0	0	0	0	1	0	0	0	http://www.ncbi.nlm.nih.gov/sites/entrez?Db=genome&Cmd=ShowDetailView&TermToSearch=27
Cloac01Bf	3843	3940880	Clostridium acetobutylicum ATCC 824	1	0	?	?	?	0	1	0	0	0	0	0	0	1	0	0	0	http://www.ncbi.nlm.nih.gov/sites/entrez?Db=genome&Cmd=ShowDetailView&TermToSearch=185
Mesfl01Bf	717	793224	Mesoplasma florum L1	?	?	?	?	?	1	0	0	0	0	0	0	0	1	0	0	0	http://www.ncbi.nlm.nih.gov/sites/entrez?Db=genome&Cmd=ShowDetailView&TermToSearch=439
Lacca01Bf	2906	2895264	Lactobacillus casei ATCC 334	?	?	?	?	?	1	0	0	0	0	0	0	0	1	0	0	0	http://www.ncbi.nlm.nih.gov/sites/entrez?Db=genome&Cmd=ShowDetailView&TermToSearch=20016
Mooth01Bf	2613	2628784	Moorella thermoacetica ATCC 39073	1	0	0	1	0	0	0	1	1	0	0	0	0	1	0	0	0	http://www.ncbi.nlm.nih.gov/sites/entrez?Db=genome&Cmd=ShowDetailView&TermToSearch=19060
Fusnu01Bu	2125	2174500	Fusobacterium nucleatum subsp nucleatum ATCC 25586	1	0	?	?	?	1	0	0	0	0	0	0	0	0	0	0	0	http://www.ncbi.nlm.nih.gov/sites/entrez?Db=genome&Cmd=ShowDetailView&TermToSearch=233
Lenar01Bv	5165	6023180	Lentisphaera araneosa HTCC2155	0	1	?	?	?	0	0	1	0	0	0	0	0	0	0	0	0	http://www.ncbi.nlm.nih.gov/sites/entrez?Db=genome&Cmd=ShowDetailView&TermToSearch=5733
Vicva01Bv	4197	5294868	Victivallis vadensis ATCC BAA-548	1	0	0	0	1	1	0	0	1	0	0	0	0	0	0	0	0	http://www.ncbi.nlm.nih.gov/sites/entrez?Db=genome&Cmd=ShowDetailView&TermToSearch=5752
Blama01Bo	6079	6653746	Blastopirellula marina DSM 3645	?	?	?	?	?	0	0	1	1	0	0	0	0	0	1	0	0	http://www.ncbi.nlm.nih.gov/sites/entrez?Db=genome&Cmd=ShowDetailView&TermToSearch=5429
Gemob01Bo	8080	9161841	Gemmata obscuriglobus	0	1	?	?	?	0	0	1	1	0	0	0	0	0	1	0	0	http://www.ncbi.nlm.nih.gov/sites/entrez?Db=genome&Cmd=ShowDetailView&TermToSearch=5854
Plama01Bo	6530	7777997	Planctomyces maris DSM 8797	0	1	?	?	?	0	0	1	1	0	0	0	0	0	1	0	0	http://www.ncbi.nlm.nih.gov/sites/entrez?Db=genome&Cmd=ShowDetailView&TermToSearch=5728
Rhoba01Bo	7405	7145576	Rhodopirellula baltica SH 1	0	1	0	0	1	0	0	1	1	0	0	0	0	0	1	0	0	http://www.ncbi.nlm.nih.gov/sites/entrez?Db=genome&Cmd=ShowDetailView&TermToSearch=308
Agrtu01Bp	2819	2841580	Agrobacterium tumefaciens str C58	0	1	?	?	?	1	0	0	1	0	0	0	0	0	0	1	0	http://www.ncbi.nlm.nih.gov/sites/entrez?Db=genome&Cmd=ShowDetailView&TermToSearch=189
Metex01Bp	4956	5471154	Methylobacterium extorquens PA1	0	1	?	?	?	1	1	1	1	0	0	0	0	0	0	1	0	http://www.ncbi.nlm.nih.gov/sites/entrez?Db=genome&Cmd=ShowDetailView&TermToSearch=21760
Ricpr01Bp	888	1111523	Rickettsia prowazekii str Madrid E	0	1	0	0	1	1	0	0	0	0	0	0	0	0	0	1	0	http://www.ncbi.nlm.nih.gov/sites/entrez?Db=genome&Cmd=ShowDetailView&TermToSearch=138
Burma01Bp	3393	3510148	Burkholderia mallei ATCC 23344	0	1	?	?	?	1	1	0	1	0	0	0	0	0	0	1	1	http://www.ncbi.nlm.nih.gov/sites/entrez?Db=genome&Cmd=ShowDetailView&TermToSearch=499
Metpe01Bp	3873	4044195	Methylibium petroleiphilum PM1	0	0	0	0	1	0	0	1	1	0	0	0	0	0	0	1	1	http://www.ncbi.nlm.nih.gov/sites/entrez?Db=genome&Cmd=ShowDetailView&TermToSearch=20316
Metfl01Bp	2822	2971517	Methylobacillus flagellatus KT	0	1	?	?	?	0	0	0	1	0	0	0	0	0	0	1	1	http://www.ncbi.nlm.nih.gov/sites/entrez?Db=genome&Cmd=ShowDetailView&TermToSearch=19366
Neime01Bp	2225	2272360	Neisseria meningitidis MC58	0	1	?	?	?	1	0	0	1	0	0	0	0	0	0	1	1	http://www.ncbi.nlm.nih.gov/sites/entrez?Db=genome&Cmd=ShowDetailView&TermToSearch=155
Desvu01Bp	3482	3570858	Desulfovibrio vulgaris subsp vulgaris str Hildenborough	1	0	?	?	?	0	1	0	1	0	0	0	0	0	0	1	0	http://www.ncbi.nlm.nih.gov/sites/entrez?Db=genome&Cmd=ShowDetailView&TermToSearch=400
Myxxa01Bp	7441	9139763	Myxococcus xanthus DK 1622	0	1	?	?	?	0	1	0	1	0	0	0	0	0	0	1	0	http://www.ncbi.nlm.nih.gov/sites/entrez?Db=genome&Cmd=ShowDetailView&TermToSearch=19516
Helpy01Bp	1627	1667867	Helicobacter pylori 26695	0	1	?	?	?	1	0	0	0	0	0	0	0	0	0	1	0	http://www.ncbi.nlm.nih.gov/sites/entrez?Db=genome&Cmd=ShowDetailView&TermToSearch=128
Sulsp02Bp	2519	2562277	Sulfurovum sp NBC37-1	0	0	0	0	1	0	0	1	0	0	0	0	0	0	0	1	0	http://www.ncbi.nlm.nih.gov/sites/entrez?Db=genome&Cmd=ShowDetailView&TermToSearch=21220
Escco01Bp	4444	4646332	Escherichia coli K12	?	?	?	?	?	1	0	0	1	0	0	0	0	0	0	1	0	http://www.ncbi.nlm.nih.gov/sites/entrez?Db=genome&Cmd=ShowDetailView&TermToSearch=19221
Metca01Bp	3052	3304561	Methylococcus capsulatus str Bath	0	1	?	?	?	0	0	0	1	0	0	0	0	0	0	1	0	http://www.ncbi.nlm.nih.gov/sites/entrez?Db=genome&Cmd=ShowDetailView&TermToSearch=507
Pseae01Bp	5682	6264404	Pseudomonas aeruginosa PAO1	0	1	?	?	?	1	1	1	1	0	0	0	0	0	0	1	0	http://www.ncbi.nlm.nih.gov/sites/entrez?Db=genome&Cmd=ShowDetailView&TermToSearch=163
Borbu01Bs	890	910724	Borrelia burgdorferi B31	0	1	?	?	?	1	0	0	0	0	0	0	0	0	0	0	0	http://www.ncbi.nlm.nih.gov/sites/entrez?Db=genome&Cmd=ShowDetailView&TermToSearch=132
Lepin01Bs	3486	4277185	Leptospira interrogans serovar Copenhageni str Fiocruz L1-130	0	1	?	?	?	1	1	1	0	0	0	0	0	0	0	0	0	http://www.ncbi.nlm.nih.gov/sites/entrez?Db=genome&Cmd=ShowDetailView&TermToSearch=396
Trepa01Bs	1095	1138011	Treponema pallidum subsp pallidum str Nichols	1	0	0	0	1	1	0	0	1	0	0	0	0	0	0	0	0	http://www.ncbi.nlm.nih.gov/sites/entrez?Db=genome&Cmd=ShowDetailView&TermToSearch=136
Ferno01Bt	1847	1948941	Fervidobacterium nodosum Rt17-B1	1	0	?	?	?	0	0	1	0	0	0	0	0	0	0	0	0	http://www.ncbi.nlm.nih.gov/sites/entrez?Db=genome&Cmd=ShowDetailView&TermToSearch=21275
Thema01Bt	1928	1860725	Thermotoga maritima MSB8	1	0	1	1	0	0	0	1	0	0	0	0	0	0	0	0	0	http://www.ncbi.nlm.nih.gov/sites/entrez?Db=genome&Cmd=ShowDetailView&TermToSearch=141
Opiba01Bv	2001	2024171	Opitutaceae bacterium TAV2	0	0	0	0	1	1	0	0	1	0	0	0	0	0	0	0	0	http://www.ncbi.nlm.nih.gov/sites/entrez?Db=genome&Cmd=ShowDetailView&TermToSearch=22793
Versp01Bv	2524	2287145	Methylokorus infernorum V4	0	1	0	1	0	0	0	0	0	0	0	0	0	0	0	0	0	http://www.ncbi.nlm.nih.gov/sites/entrez?Db=genome&Cmd=ShowDetailView&TermToSearch=22438
