# Supplementary material for: Harvesting Evolutionary Signals in a Forest of Prokaryotic Gene Trees
Source: Oxford University Press journal article supplement (doi:10.1093/molbev/msq323), 2010-12-20
Supplement: msq323_Supplementary_Data.zip [file msq323_Supplementary_Data.zip › mbe-10-0656-File010.xls]

## Sheet: 6901 trees
A) For trees
Taxonomical category	Lifestyle category	E(Taxon)>E(Lifest)	E(Taxon)<E(Lifest)	E(Taxon)==E(Lifest)	E(Taxon)==E(Lifest)=0	Identical partitions for equal E(Lifest) & E(Taxon)	% Identical partitions for equal E(Lifest) & E(Taxon)	% lifestyle trees	% taxonomical trees	% equally well structured trees
Archaea	Anaerobe	500	2597	3804	3774	517	0.13591	0.0724533	0.376322	0.551224
Archaea	Aerobe	469	2938	3494	3480	26	0.00744133	0.0679612	0.425735	0.506303
Archaea	Hyper	862	1561	4478	4467	257	0.0573917	0.124909	0.226199	0.648891
Archaea	Thermo	512	2164	4225	4216	339	0.0802367	0.0741921	0.313578	0.61223
Archaea	Meso	909	1500	4492	4491	3	0.000667854	0.13172	0.21736	0.65092
Archaea	Host	693	2817	3391	3383	9	0.00265408	0.10042	0.408202	0.491378
Archaea	Soil	378	4165	2358	2347	17	0.0072095	0.0547747	0.603536	0.34169
Archaea	Aquatic	175	4444	2282	2239	373	0.163453	0.0253586	0.643965	0.330677
Archaea	GC	324	3846	2731	2707	6	0.002197	0.0469497	0.557311	0.39574
Average							0.0507956	0.0776377	0.419134	0.503228
Crenarchaeota	Anaerobe	142	2844	3915	3915	5	0.00127714	0.0205767	0.412114	0.567309
Crenarchaeota	Aerobe	138	3151	3612	3609	40	0.0110742	0.0199971	0.4566	0.523402
Crenarchaeota	Hyper	139	1780	4982	4979	145	0.0291048	0.020142	0.257934	0.721924
Crenarchaeota	Thermo	151	2238	4512	4512	149	0.033023	0.0218809	0.324301	0.653818
Crenarchaeota	Meso	451	1741	4709	4709	0	0	0.0653528	0.252282	0.682365
Crenarchaeota	Host	290	3067	3544	3543	28	0.00790068	0.0420229	0.444428	0.513549
Crenarchaeota	Soil	155	4349	2397	2396	0	0	0.0224605	0.630199	0.347341
Crenarchaeota	Aquatic	38	4578	2285	2281	89	0.0389497	0.00550645	0.663382	0.331111
Crenarchaeota	GC	49	4079	2773	2771	11	0.00396682	0.00710042	0.591074	0.401826
Average							0.0139218	0.0250044	0.448035	0.526961
Euryarchaeota	Anaerobe	468	2625	3808	3783	547	0.143645	0.0678163	0.38038	0.551804
Euryarchaeota	Aerobe	460	2956	3485	3475	5	0.00143472	0.066657	0.428344	0.504999
Euryarchaeota	Hyper	815	1571	4515	4508	151	0.0334441	0.118099	0.227648	0.654253
Euryarchaeota	Thermo	528	2169	4204	4197	142	0.0337774	0.0765107	0.314302	0.609187
Euryarchaeota	Meso	1031	1513	4357	4356	5	0.00114758	0.149399	0.219244	0.631358
Euryarchaeota	Host	764	2821	3316	3310	2	0.000603136	0.110709	0.408781	0.48051
Euryarchaeota	Soil	412	4171	2318	2309	34	0.0146678	0.0597015	0.604405	0.335893
Euryarchaeota	Aquatic	155	4485	2261	2231	250	0.110571	0.0224605	0.649906	0.327634
Euryarchaeota	GC	287	3881	2733	2712	6	0.00219539	0.0415882	0.562382	0.39603
Average							0.0379428	0.0792156	0.42171	0.499074
Cyanobacteria	Anaerobe	420	2782	3699	3691	0	0	0.0608607	0.40313	0.536009
Cyanobacteria	Aerobe	292	3155	3454	3447	68	0.0196873	0.0423127	0.45718	0.500507
Cyanobacteria	Hyper	742	1721	4438	4438	0	0	0.107521	0.249384	0.643095
Cyanobacteria	Thermo	446	2205	4250	4250	14	0.00329412	0.0646283	0.319519	0.615853
Cyanobacteria	Meso	567	1760	4574	4574	7	0.00153039	0.082162	0.255036	0.662802
Cyanobacteria	Host	401	3019	3481	3474	0	0	0.0581075	0.437473	0.50442
Cyanobacteria	Soil	168	4311	2422	2399	59	0.02436	0.0243443	0.624692	0.350964
Cyanobacteria	Aquatic	101	4530	2270	2242	65	0.0286344	0.0146356	0.656427	0.328938
Cyanobacteria	GC	177	3980	2744	2726	4	0.00145773	0.0256485	0.576728	0.397624
Average							0.00877377	0.0533578	0.442174	0.504468
Firmicutes	Anaerobe	195	2819	3887	3885	56	0.014407	0.0282568	0.408492	0.563252
Firmicutes	Aerobe	156	3162	3583	3580	0	0	0.0226054	0.458194	0.5192
Firmicutes	Hyper	600	1688	4613	4613	0	0	0.0869439	0.244602	0.668454
Firmicutes	Thermo	261	2222	4418	4418	36	0.00814848	0.0378206	0.321982	0.640197
Firmicutes	Meso	392	1748	4761	4761	0	0	0.0568034	0.253297	0.6899
Firmicutes	Host	165	3078	3658	3643	10	0.00273373	0.0239096	0.446022	0.530068
Firmicutes	Soil	79	4359	2463	2451	40	0.0162404	0.0114476	0.631648	0.356905
Firmicutes	Aquatic	79	4548	2274	2272	1	0.000439754	0.0114476	0.659035	0.329517
Firmicutes	GC	90	4050	2761	2754	8	0.0028975	0.0130416	0.586871	0.400087
Average							0.0049852	0.0324752	0.445571	0.521953
Planctomycetes	Anaerobe	484	2796	3621	3620	0	0	0.0701348	0.405159	0.524707
Planctomycetes	Aerobe	331	3174	3396	3395	21	0.00618375	0.0479641	0.459933	0.492103
Planctomycetes	Hyper	794	1732	4375	4375	0	0	0.115056	0.250978	0.633966
Planctomycetes	Thermo	519	2201	4181	4181	0	0	0.0752065	0.318939	0.605854
Planctomycetes	Meso	608	1773	4520	4520	49	0.0108407	0.0881032	0.256919	0.654978
Planctomycetes	Host	377	3062	3462	3456	0	0	0.0546298	0.443704	0.501666
Planctomycetes	Soil	206	4337	2358	2347	0	0	0.0298507	0.62846	0.34169
Planctomycetes	Aquatic	136	4527	2238	2208	133	0.0594281	0.0197073	0.655992	0.324301
Planctomycetes	GC	257	4028	2616	2597	95	0.036315	0.037241	0.583684	0.379075
Average							0.0125297	0.0597659	0.444863	0.495371
Proteobacteria	Anaerobe	1106	2446	3349	3335	17	0.00507614	0.160267	0.354441	0.485292
Proteobacteria	Aerobe	715	2927	3259	3227	81	0.0248542	0.103608	0.424141	0.47225
Proteobacteria	Hyper	1778	1429	3694	3694	0	0	0.257644	0.207071	0.535285
Proteobacteria	Thermo	1098	2090	3713	3713	0	0	0.159107	0.302855	0.538038
Proteobacteria	Meso	1437	1438	4026	4025	44	0.010929	0.208231	0.208376	0.583394
Proteobacteria	Host	806	2572	3523	3428	258	0.073233	0.116795	0.3727	0.510506
Proteobacteria	Soil	446	4078	2377	2309	125	0.0525873	0.0646283	0.590929	0.344443
Proteobacteria	Aquatic	327	4322	2252	2191	8	0.0035524	0.0473844	0.626286	0.32633
Proteobacteria	GC	587	3777	2537	2485	265	0.104454	0.0850601	0.547312	0.367628
Average							0.0305207	0.133636	0.40379	0.462574
Beta.proteobacteria	Anaerobe	361	2804	3736	3735	0	0	0.0523113	0.406318	0.541371
Beta.proteobacteria	Aerobe	165	3182	3554	3548	12	0.00337648	0.0239096	0.461093	0.514998
Beta.proteobacteria	Hyper	624	1737	4540	4540	0	0	0.0904217	0.251703	0.657876
Beta.proteobacteria	Thermo	359	2213	4329	4329	0	0	0.0520214	0.320678	0.6273
Beta.proteobacteria	Meso	439	1778	4684	4684	69	0.014731	0.063614	0.257644	0.678742
Beta.proteobacteria	Host	151	3081	3669	3650	50	0.0136277	0.0218809	0.446457	0.531662
Beta.proteobacteria	Soil	94	4366	2441	2430	13	0.00532569	0.0136212	0.632662	0.353717
Beta.proteobacteria	Aquatic	71	4528	2302	2287	8	0.00347524	0.0102884	0.656137	0.333575
Beta.proteobacteria	GC	157	4077	2667	2664	23	0.00862392	0.0227503	0.590784	0.386466
Average							0.00546222	0.0389799	0.447053	0.513967
B) for clans
Taxonomical category	Lifestyle category	E(Taxon)>E(Lifest)	E(Taxon)<E(Lifest)	E(Taxon)==E(Lifest)	E(Taxon)==E(Lifest)=0	Identical partitions for equal E(Lifest) & E(Taxon)	% Identical partitions for equal E(Lifest) & E(Taxon)	% lifestyle clans	% taxonomical clans	% equally well structured clans
Archaea	Anaerobe	451	2195	4255	4214	517	0.121504	0.0653528	0.31807	0.616577
Archaea	Aerobe	391	2223	4287	4252	26	0.00606485	0.0566585	0.322127	0.621214
Archaea	Hyperthermophile	658	1363	4880	4857	257	0.0526639	0.0953485	0.197508	0.707144
Archaea	Thermophile	444	1759	4698	4675	339	0.0721584	0.0643385	0.254891	0.680771
Archaea	Mesophile	656	1326	4919	4908	3	0.00060988	0.0950587	0.192146	0.712795
Archaea	Host	584	2388	3929	3915	9	0.00229066	0.0846254	0.346037	0.569338
Archaea	Soil	315	3402	3184	3163	17	0.0053392	0.0456456	0.492972	0.461382
Archaea	Aquatic	143	3400	3358	3298	373	0.111078	0.0207216	0.492682	0.486596
Archaea	GC	335	2982	3584	3547	6	0.00167411	0.0485437	0.432111	0.519345
Average							0.041487	0.0640326	0.338727	0.59724
Crenarchaeota	Anaerobe	168	2426	4307	4303	5	0.0011609	0.0243443	0.351543	0.624112
Crenarchaeota	Aerobe	114	2404	4383	4366	40	0.00912617	0.0165193	0.348355	0.635125
Crenarchaeota	Hyperthermophile	108	1514	5279	5270	145	0.0274673	0.0156499	0.219388	0.764962
Crenarchaeota	Thermophile	163	1817	4921	4910	149	0.0302784	0.0236198	0.263295	0.713085
Crenarchaeota	Mesophile	320	1475	5106	5102	0	0	0.0463701	0.213737	0.739893
Crenarchaeota	Host	248	2659	3994	3992	28	0.00701052	0.0359368	0.385306	0.578757
Crenarchaeota	Soil	118	3600	3183	3182	0	0	0.017099	0.521664	0.461238
Crenarchaeota	Aquatic	52	3508	3341	3326	89	0.0266387	0.00753514	0.508332	0.484133
Crenarchaeota	GC	74	3197	3630	3622	11	0.0030303	0.0107231	0.463266	0.526011
Average							0.0116347	0.0219775	0.363876	0.614146
Euryarchaeota	Anaerobe	454	2224	4223	4190	547	0.129529	0.0657876	0.322272	0.61194
Euryarchaeota	Aerobe	389	2241	4271	4239	5	0.00117069	0.0563686	0.324736	0.618896
Euryarchaeota	Hyperthermophile	620	1403	4878	4857	151	0.0309553	0.0898421	0.203304	0.706854
Euryarchaeota	Thermophile	490	1769	4642	4625	142	0.0305903	0.0710042	0.25634	0.672656
Euryarchaeota	Mesophile	726	1366	4809	4800	5	0.00103972	0.105202	0.197942	0.696856
Euryarchaeota	Host	628	2427	3846	3836	2	0.000520021	0.0910013	0.351688	0.557311
Euryarchaeota	Soil	317	3432	3152	3121	34	0.0107868	0.0459354	0.497319	0.456745
Euryarchaeota	Aquatic	148	3417	3336	3274	250	0.07494	0.0214462	0.495146	0.483408
Euryarchaeota	GC	318	3010	3573	3541	6	0.00167926	0.0460803	0.436169	0.517751
Average							0.0312457	0.065852	0.342768	0.59138
Firmicutes	Anaerobe	334	2392	4175	4163	0	0	0.0483988	0.346616	0.604985
Firmicutes	Aerobe	258	2425	4218	4206	68	0.0161214	0.0373859	0.351398	0.611216
Firmicutes	Hyperthermophile	554	1494	4853	4852	0	0	0.0802782	0.21649	0.703231
Firmicutes	Thermophile	372	1812	4717	4713	14	0.00296799	0.0539052	0.262571	0.683524
Firmicutes	Mesophile	441	1490	4970	4964	7	0.00140845	0.0639038	0.215911	0.720185
Firmicutes	Host	315	2614	3972	3961	0	0	0.0456456	0.378786	0.575569
Firmicutes	Soil	151	3545	3205	3169	59	0.0184087	0.0218809	0.513694	0.464425
Firmicutes	Aquatic	94	3459	3348	3302	65	0.0194146	0.0136212	0.501232	0.485147
Firmicutes	GC	170	3121	3610	3569	4	0.00110803	0.0246341	0.452253	0.523113
Average							0.00660324	0.0432949	0.359883	0.596822
Cyanobacteria	Anaerobe	197	2432	4272	4262	56	0.0131086	0.0285466	0.352413	0.619041
Cyanobacteria	Aerobe	150	2412	4339	4323	0	0	0.021736	0.349515	0.628749
Cyanobacteria	Hyperthermophile	488	1478	4935	4931	0	0	0.0707144	0.214172	0.715114
Cyanobacteria	Thermophile	261	1798	4842	4831	36	0.00743494	0.0378206	0.260542	0.701637
Cyanobacteria	Mesophile	311	1491	5099	5092	0	0	0.0450659	0.216056	0.738878
Cyanobacteria	Host	169	2678	4054	4041	10	0.0024667	0.0244892	0.38806	0.587451
Cyanobacteria	Soil	94	3581	3226	3205	40	0.0123993	0.0136212	0.51891	0.467468
Cyanobacteria	Aquatic	88	3462	3351	3333	1	0.000298418	0.0127518	0.501666	0.485582
Cyanobacteria	GC	120	3158	3623	3604	8	0.00220811	0.0173888	0.457615	0.524996
Average							0.00421289	0.0302372	0.362105	0.607658
Planctomycetes	Anaerobe	367	2392	4142	4129	0	0	0.0531807	0.346616	0.600203
Planctomycetes	Aerobe	290	2425	4186	4169	21	0.00501672	0.0420229	0.351398	0.606579
Planctomycetes	Hyperthermophile	599	1497	4805	4802	0	0	0.086799	0.216925	0.696276
Planctomycetes	Thermophile	408	1804	4689	4685	0	0	0.0591219	0.261411	0.679467
Planctomycetes	Mesophile	473	1501	4927	4921	49	0.0099452	0.0685408	0.217505	0.713954
Planctomycetes	Host	309	2635	3957	3947	0	0	0.0447761	0.381829	0.573395
Planctomycetes	Soil	163	3552	3186	3160	0	0	0.0236198	0.514708	0.461672
Planctomycetes	Aquatic	128	3451	3322	3278	133	0.0400361	0.018548	0.500072	0.48138
Planctomycetes	GC	229	3158	3514	3484	95	0.0270347	0.0331836	0.457615	0.509202
Average							0.00911475	0.0477548	0.360898	0.591347
Proteobacteria	Anaerobe	865	2101	3935	3910	17	0.0043202	0.125344	0.304449	0.570207
Proteobacteria	Aerobe	589	2287	4025	3975	81	0.0201242	0.0853499	0.331401	0.583249
Proteobacteria	Hyperthermophile	1333	1361	4207	4201	0	0	0.19316	0.197218	0.609622
Proteobacteria	Thermophile	870	1763	4268	4256	0	0	0.126069	0.25547	0.618461
Proteobacteria	Mesophile	1051	1390	4460	4452	44	0.00986547	0.152297	0.20142	0.646283
Proteobacteria	Host	668	2252	3981	3879	258	0.0648078	0.0967976	0.32633	0.576873
Proteobacteria	Soil	352	3341	3208	3107	125	0.0389651	0.0510071	0.484133	0.46486
Proteobacteria	Aquatic	267	3326	3308	3225	8	0.00241838	0.03869	0.481959	0.479351
Proteobacteria	GC	485	2943	3473	3391	265	0.0763029	0.0702797	0.42646	0.50326
Average							0.0240893	0.104333	0.334315	0.561352
Beta.proteobacteria	Anaerobe	369	2326	4206	4201	0	0	0.0534705	0.337053	0.609477
Beta.proteobacteria	Aerobe	234	2376	4291	4276	12	0.00279655	0.0339081	0.344298	0.621794
Beta.proteobacteria	Hyperthermophile	514	1434	4953	4947	0	0	0.074482	0.207796	0.717722
Beta.proteobacteria	Thermophile	314	1760	4827	4806	0	0	0.0455007	0.255036	0.699464
Beta.proteobacteria	Mesophile	391	1443	5067	5053	69	0.0136175	0.0566585	0.2091	0.734241
Beta.proteobacteria	Host	261	2568	4072	4055	50	0.012279	0.0378206	0.37212	0.590059
Beta.proteobacteria	Soil	179	3504	3218	3198	13	0.00403978	0.0259383	0.507752	0.466309
Beta.proteobacteria	Aquatic	125	3411	3365	3334	8	0.00237741	0.0181133	0.494276	0.48761
Beta.proteobacteria	GC	230	3109	3562	3552	23	0.00645705	0.0333285	0.450514	0.516157
Average							0.00461859	0.0421356	0.353105	0.604759
B) for slices
Taxonomical category	Lifestyle category	E(Taxon)>E(Lifest)	E(Taxon)<E(Lifest)	E(Taxon)==E(Lifest)	E(Taxon)==E(Lifest)=0	Identical partitions for equal E(Lifest) & E(Taxon)	% Identical partitions for equal E(Lifest) & E(Taxon)	% lifestyle slices	% taxonomical slices	% equally well structured slices
Archaea	Anaerobe	421	1873	4607	4552	517	0.112221	0.0610057	0.27141	0.667584
Archaea	Aerobe	359	1862	4680	4624	26	0.00555556	0.0520214	0.269816	0.678163
Archaea	Hyperthermophile	571	1163	5167	5129	257	0.0497387	0.0827416	0.168526	0.748732
Archaea	Thermophile	450	1383	5068	5025	339	0.0668903	0.0652079	0.200406	0.734386
Archaea	Mesophile	551	1143	5207	5186	3	0.000576147	0.0798435	0.165628	0.754528
Archaea	Host	551	2069	4281	4263	9	0.00210231	0.0798435	0.299812	0.620345
Archaea	Soil	341	2798	3762	3729	17	0.00451887	0.0494131	0.405448	0.545138
Archaea	Aquatic	148	2768	3985	3881	373	0.093601	0.0214462	0.401101	0.577453
Archaea	GC	350	2394	4157	4104	6	0.00144335	0.0507173	0.346906	0.602376
Average							0.0374052	0.0602489	0.281006	0.658745
Crenarchaeota	Anaerobe	153	2109	4639	4628	5	0.00107782	0.0221707	0.305608	0.672221
Crenarchaeota	Aerobe	102	2044	4755	4737	40	0.0084122	0.0147805	0.296189	0.689031
Crenarchaeota	Hyperthermophile	123	1291	5487	5472	145	0.0264261	0.0178235	0.187074	0.795102
Crenarchaeota	Thermophile	191	1453	5257	5244	149	0.0283432	0.0276771	0.210549	0.761774
Crenarchaeota	Mesophile	238	1258	5405	5392	0	0	0.0344878	0.182292	0.78322
Crenarchaeota	Host	204	2365	4332	4325	28	0.00646353	0.0295609	0.342704	0.627735
Crenarchaeota	Soil	103	3044	3754	3752	0	0	0.0149254	0.441095	0.543979
Crenarchaeota	Aquatic	43	2929	3929	3910	89	0.0226521	0.00623098	0.424431	0.569338
Crenarchaeota	GC	83	2626	4192	4180	11	0.00262405	0.0120272	0.380525	0.607448
Average							0.0106665	0.0199649	0.30783	0.672205
Euryarchaeota	Anaerobe	410	1923	4568	4523	547	0.119746	0.0594117	0.278655	0.661933
Euryarchaeota	Aerobe	361	1874	4666	4623	5	0.00107158	0.0523113	0.271555	0.676134
Euryarchaeota	Hyperthermophile	547	1198	5156	5120	151	0.0292863	0.0792639	0.173598	0.747138
Euryarchaeota	Thermophile	481	1393	5027	4982	142	0.0282475	0.0697	0.201855	0.728445
Euryarchaeota	Mesophile	601	1164	5136	5110	5	0.00097352	0.0870888	0.168671	0.74424
Euryarchaeota	Host	566	2112	4223	4207	2	0.000473597	0.0820171	0.306043	0.61194
Euryarchaeota	Soil	325	2841	3735	3704	34	0.00910308	0.0470946	0.411679	0.541226
Euryarchaeota	Aquatic	163	2792	3946	3857	250	0.0633553	0.0236198	0.404579	0.571801
Euryarchaeota	GC	319	2430	4152	4106	6	0.00144509	0.0462252	0.352123	0.601652
Average							0.0281891	0.060748	0.285418	0.653834
Firmicutes	Anaerobe	267	2080	4554	4541	0	0	0.03869	0.301406	0.659904
Firmicutes	Aerobe	236	2049	4616	4599	68	0.0147314	0.0341979	0.296913	0.668889
Firmicutes	Hyperthermophile	442	1304	5155	5151	0	0	0.0640487	0.188958	0.746993
Firmicutes	Thermophile	330	1455	5116	5108	14	0.00273651	0.0478192	0.210839	0.741342
Firmicutes	Mesophile	377	1263	5261	5246	7	0.00133055	0.0546298	0.183017	0.762353
Firmicutes	Host	255	2309	4337	4310	0	0	0.0369512	0.334589	0.62846
Firmicutes	Soil	129	3012	3760	3731	59	0.0156915	0.0186929	0.436458	0.544849
Firmicutes	Aquatic	88	2885	3928	3880	65	0.0165479	0.0127518	0.418055	0.569193
Firmicutes	GC	164	2584	4153	4115	4	0.000963159	0.0237647	0.374438	0.601797
Average							0.00577788	0.0368385	0.304964	0.658198
Cyanobacteria	Anaerobe	182	2101	4618	4603	56	0.0121265	0.026373	0.304449	0.669178
Cyanobacteria	Aerobe	139	2035	4727	4700	0	0	0.020142	0.294885	0.684973
Cyanobacteria	Hyperthermophile	426	1265	5210	5194	0	0	0.0617302	0.183307	0.754963
Cyanobacteria	Thermophile	244	1435	5222	5199	36	0.00689391	0.0353572	0.207941	0.756702
Cyanobacteria	Mesophile	290	1259	5352	5338	0	0	0.0420229	0.182437	0.77554
Cyanobacteria	Host	180	2362	4359	4345	10	0.0022941	0.0260832	0.342269	0.631648
Cyanobacteria	Soil	99	3010	3792	3762	40	0.0105485	0.0143457	0.436169	0.549486
Cyanobacteria	Aquatic	73	2873	3955	3918	1	0.000252845	0.0105782	0.416316	0.573105
Cyanobacteria	GC	131	2599	4171	4148	8	0.00191801	0.0189828	0.376612	0.604405
Average							0.00378154	0.0284017	0.304932	0.666667
Planctomycetes	Anaerobe	269	2073	4559	4539	0	0	0.0389799	0.300391	0.660629
Planctomycetes	Aerobe	232	2051	4618	4592	21	0.00454742	0.0336183	0.297203	0.669178
Planctomycetes	Hyperthermophile	466	1299	5136	5129	0	0	0.0675264	0.188234	0.74424
Planctomycetes	Thermophile	330	1444	5127	5108	0	0	0.0478192	0.209245	0.742936
Planctomycetes	Mesophile	396	1275	5230	5223	49	0.00936902	0.057383	0.184756	0.757861
Planctomycetes	Host	264	2307	4330	4313	0	0	0.0382553	0.334299	0.627445
Planctomycetes	Soil	139	2987	3775	3736	0	0	0.020142	0.432836	0.547022
Planctomycetes	Aquatic	107	2879	3915	3869	133	0.0339719	0.015505	0.417186	0.567309
Planctomycetes	GC	181	2610	4110	4081	95	0.0231144	0.0262281	0.378206	0.595566
Average							0.00788919	0.0383841	0.304706	0.65691
Proteobacteria	Anaerobe	718	1801	4382	4336	17	0.00387951	0.104043	0.260977	0.63498
Proteobacteria	Aerobe	534	1947	4420	4362	81	0.0183258	0.0773801	0.282133	0.640487
Proteobacteria	Hyperthermophile	1126	1224	4551	4543	0	0	0.163165	0.177366	0.65947
Proteobacteria	Thermophile	799	1424	4678	4654	0	0	0.11578	0.206347	0.677873
Proteobacteria	Mesophile	950	1208	4743	4730	44	0.00927683	0.137661	0.175047	0.687292
Proteobacteria	Host	606	1936	4359	4237	258	0.0591879	0.0878134	0.280539	0.631648
Proteobacteria	Soil	336	2760	3805	3691	125	0.0328515	0.0486886	0.399942	0.551369
Proteobacteria	Aquatic	218	2738	3945	3819	8	0.00202788	0.0315896	0.396754	0.571656
Proteobacteria	GC	456	2391	4054	3963	265	0.0653675	0.0660774	0.346472	0.587451
Average							0.021213	0.0924665	0.28062	0.626914
Beta.proteobacteria	Anaerobe	303	2014	4584	4573	0	0	0.0439067	0.291842	0.664252
Beta.proteobacteria	Aerobe	218	2000	4683	4658	12	0.00256246	0.0315896	0.289813	0.678597
Beta.proteobacteria	Hyperthermophile	405	1262	5234	5224	0	0	0.0586871	0.182872	0.758441
Beta.proteobacteria	Thermophile	274	1410	5217	5181	0	0	0.0397044	0.204318	0.755977
Beta.proteobacteria	Mesophile	334	1234	5333	5316	69	0.0129383	0.0483988	0.178815	0.772787
Beta.proteobacteria	Host	232	2274	4395	4365	50	0.0113766	0.0336183	0.329517	0.636864
Beta.proteobacteria	Soil	165	2948	3788	3755	13	0.00343189	0.0239096	0.427184	0.548906
Beta.proteobacteria	Aquatic	109	2829	3963	3911	8	0.00201867	0.0157948	0.409941	0.574265
Beta.proteobacteria	GC	211	2560	4130	4111	23	0.00556901	0.0305753	0.370961	0.598464
Average							0.00421077	0.0362427	0.298363	0.665395
	Plots of the average structure (y-axis) for 8 taxonomical categories (x-axis)

## Sheet: 6901 trees (with BS > 50%)
A) For trees
Taxonomical category	Lifestyle category	E(Taxon)>E(Lifest)	E(Taxon)<E(Lifest)	E(Taxon)==E(Lifest)	E(Taxon)==E(Lifest)=0	Identical partitions for equal E(Lifest) & E(Taxon)	% Identical partitions for equal E(Lifest) & E(Taxon)	% lifestyle trees	% taxonomical trees	% equally well structured trees
Archaea	Anaerobe	708	2418	3775	3723	517	0.136954	0.102594	0.350384	0.547022
Archaea	Aerobe	674	2770	3457	3430	26	0.00752097	0.097667	0.401391	0.500942
Archaea	Hyperthermophile	766	1722	4413	4387	257	0.058237	0.110998	0.249529	0.639473
Archaea	Thermophile	528	2182	4191	4168	339	0.0808876	0.0765107	0.316186	0.607303
Archaea	Mesophile	1000	1464	4437	4432	3	0.000676133	0.144907	0.212143	0.64295
Archaea	Host	933	2634	3334	3320	9	0.00269946	0.135198	0.381684	0.483118
Archaea	Soil	493	4103	2305	2274	17	0.00737527	0.0714389	0.594552	0.33401
Archaea	Aquatic	198	4441	2262	2192	373	0.164898	0.0286915	0.64353	0.327779
Archaea	GC	550	3680	2671	2636	6	0.00224635	0.0796986	0.533256	0.387045
Average							0.0512772	0.0941892	0.409184	0.496627
Crenarchaeota	Anaerobe	309	2725	3867	3862	5	0.00129299	0.0447761	0.39487	0.560354
Crenarchaeota	Aerobe	253	3085	3563	3557	40	0.0112265	0.0366614	0.447037	0.516302
Crenarchaeota	Hyperthermophile	122	1870	4909	4905	145	0.0295376	0.0176786	0.270975	0.711346
Crenarchaeota	Thermophile	169	2279	4453	4451	149	0.0334606	0.0244892	0.330242	0.645269
Crenarchaeota	Mesophile	556	1711	4634	4633	0	0	0.080568	0.247935	0.671497
Crenarchaeota	Host	448	2972	3481	3479	28	0.00804367	0.0649181	0.430662	0.50442
Crenarchaeota	Soil	219	4360	2322	2319	0	0	0.0317345	0.631792	0.336473
Crenarchaeota	Aquatic	53	4610	2238	2231	89	0.0397676	0.00768005	0.668019	0.324301
Crenarchaeota	GC	145	4054	2702	2697	11	0.00407106	0.0210114	0.587451	0.391537
Average							0.0141556	0.0366131	0.445443	0.517944
Euryarchaeota	Anaerobe	698	2428	3775	3736	547	0.144901	0.101145	0.351833	0.547022
Euryarchaeota	Aerobe	683	2772	3446	3428	5	0.00145096	0.0989712	0.401681	0.499348
Euryarchaeota	Hyperthermophile	702	1749	4450	4432	151	0.0339326	0.101724	0.253442	0.644834
Euryarchaeota	Thermophile	525	2209	4167	4148	142	0.0340773	0.0760759	0.320099	0.603826
Euryarchaeota	Mesophile	1121	1492	4288	4284	5	0.00116604	0.16244	0.216201	0.621359
Euryarchaeota	Host	986	2665	3250	3238	2	0.000615385	0.142878	0.386176	0.470946
Euryarchaeota	Soil	498	4143	2260	2232	34	0.0150442	0.0721635	0.600348	0.327489
Euryarchaeota	Aquatic	183	4485	2233	2182	250	0.111957	0.0265179	0.649906	0.323576
Euryarchaeota	GC	504	3726	2671	2638	6	0.00224635	0.0730329	0.539922	0.387045
Average							0.0383767	0.0949943	0.41329	0.491716
Cyanobacteria	Anaerobe	613	2650	3638	3626	0	0	0.0888277	0.384002	0.52717
Cyanobacteria	Aerobe	485	3008	3408	3386	68	0.0199531	0.0702797	0.435879	0.493841
Cyanobacteria	Hyperthermophile	737	1822	4342	4341	0	0	0.106796	0.26402	0.629184
Cyanobacteria	Thermophile	464	2240	4197	4190	14	0.00333572	0.0672366	0.324591	0.608173
Cyanobacteria	Mesophile	704	1680	4517	4510	7	0.0015497	0.102014	0.243443	0.654543
Cyanobacteria	Host	633	2834	3434	3417	0	0	0.0917258	0.410665	0.497609
Cyanobacteria	Soil	232	4295	2374	2332	59	0.0248526	0.0336183	0.622374	0.344008
Cyanobacteria	Aquatic	143	4517	2241	2192	65	0.0290049	0.0207216	0.654543	0.324736
Cyanobacteria	GC	389	3830	2682	2657	4	0.00149142	0.0563686	0.554992	0.388639
Average							0.00890971	0.0708432	0.432723	0.496434
Firmicutes	Anaerobe	316	2743	3842	3836	56	0.0145757	0.0457905	0.397479	0.556731
Firmicutes	Aerobe	262	3101	3538	3530	0	0	0.0379655	0.449355	0.512679
Firmicutes	Hyperthermophile	511	1835	4555	4555	0	0	0.0740472	0.265903	0.660049
Firmicutes	Thermophile	270	2271	4360	4360	36	0.00825688	0.0391248	0.329083	0.631792
Firmicutes	Mesophile	492	1710	4699	4699	0	0	0.071294	0.24779	0.680916
Firmicutes	Host	332	2957	3612	3592	10	0.00276855	0.048109	0.428489	0.523402
Firmicutes	Soil	111	4379	2411	2387	40	0.0165906	0.0160846	0.634546	0.34937
Firmicutes	Aquatic	83	4580	2238	2228	1	0.000446828	0.0120272	0.663672	0.324301
Firmicutes	GC	199	4005	2697	2684	8	0.00296626	0.0288364	0.580351	0.390813
Average							0.00506721	0.0414755	0.444074	0.51445
Planctomycetes	Anaerobe	616	2732	3553	3545	0	0	0.0892624	0.395885	0.514853
Planctomycetes	Aerobe	488	3075	3338	3329	21	0.00629119	0.0707144	0.445588	0.483698
Planctomycetes	Hyperthermophile	800	1830	4271	4270	0	0	0.115925	0.265179	0.618896
Planctomycetes	Thermophile	556	2237	4108	4104	0	0	0.080568	0.324156	0.595276
Planctomycetes	Mesophile	743	1707	4451	4446	49	0.0110088	0.107666	0.247355	0.644979
Planctomycetes	Host	561	2936	3404	3392	0	0	0.0812926	0.425446	0.493262
Planctomycetes	Soil	275	4325	2301	2274	0	0	0.0398493	0.626721	0.33343
Planctomycetes	Aquatic	172	4527	2202	2159	133	0.0603996	0.0249239	0.655992	0.319084
Planctomycetes	GC	437	3919	2545	2518	95	0.0373281	0.0633242	0.567889	0.368787
Average							0.0127809	0.0748362	0.439357	0.485807
Proteobacteria	Anaerobe	1302	2314	3285	3264	17	0.00517504	0.188668	0.335314	0.476018
Proteobacteria	Aerobe	940	2750	3211	3162	81	0.0252258	0.136212	0.398493	0.465295
Proteobacteria	Hyperthermophile	1573	1713	3615	3615	0	0	0.227938	0.248225	0.523837
Proteobacteria	Thermophile	1077	2178	3646	3641	0	0	0.156064	0.315606	0.528329
Proteobacteria	Mesophile	1494	1443	3964	3959	44	0.0110999	0.21649	0.2091	0.57441
Proteobacteria	Host	1009	2337	3555	3384	258	0.0725738	0.146211	0.338647	0.515143
Proteobacteria	Soil	474	4066	2361	2247	125	0.0529437	0.0686857	0.58919	0.342124
Proteobacteria	Aquatic	335	4334	2232	2148	8	0.00358423	0.0485437	0.628025	0.323431
Proteobacteria	GC	845	3570	2486	2409	265	0.106597	0.122446	0.517316	0.360238
Average							0.0307999	0.145695	0.397768	0.456536
Beta.proteobacteria	Anaerobe	474	2751	3676	3672	0	0	0.0686857	0.398638	0.532676
Beta.proteobacteria	Aerobe	304	3091	3506	3492	12	0.0034227	0.0440516	0.447906	0.508042
Beta.proteobacteria	Hyperthermophile	605	1841	4455	4455	0	0	0.0876685	0.266773	0.645559
Beta.proteobacteria	Thermophile	369	2261	4271	4271	0	0	0.0534705	0.327634	0.618896
Beta.proteobacteria	Mesophile	552	1723	4626	4625	69	0.0149157	0.0799884	0.249674	0.670338
Beta.proteobacteria	Host	384	2868	3649	3609	50	0.0137024	0.0556441	0.415592	0.528764
Beta.proteobacteria	Soil	160	4354	2387	2363	13	0.00544617	0.023185	0.630923	0.345892
Beta.proteobacteria	Aquatic	82	4544	2275	2245	8	0.00351648	0.0118823	0.658455	0.329662
Beta.proteobacteria	GC	331	3974	2596	2588	23	0.00885978	0.0479641	0.575859	0.376177
Average							0.00554036	0.0525045	0.441273	0.506223
B) for clans
Taxonomical category	Lifestyle category	E(Taxon)>E(Lifest)	E(Taxon)<E(Lifest)	E(Taxon)==E(Lifest)	E(Taxon)==E(Lifest)=0	Identical partitions for equal E(Lifest) & E(Taxon)	% Identical partitions for equal E(Lifest) & E(Taxon)	% lifestyle clans	% taxonomical clans	% equally well structured clans
Archaea	Anaerobe	623	2077	4201	4105	517	0.123066	0.0902768	0.300971	0.608752
Archaea	Aerobe	513	2174	4214	4138	26	0.00616991	0.0743371	0.315027	0.610636
Archaea	Hyperthermophile	601	1564	4736	4679	257	0.0542652	0.0870888	0.226634	0.686277
Archaea	Thermophile	455	1873	4573	4529	339	0.0741308	0.0659325	0.27141	0.662658
Archaea	Mesophile	694	1401	4806	4779	3	0.00062422	0.100565	0.203014	0.696421
Archaea	Host	834	2232	3835	3797	9	0.00234681	0.120852	0.323431	0.555717
Archaea	Soil	421	3389	3091	3026	17	0.00549984	0.0610057	0.491088	0.447906
Archaea	Aquatic	164	3425	3312	3203	373	0.112621	0.0237647	0.496305	0.47993
Archaea	GC	521	2910	3470	3391	6	0.00172911	0.0754963	0.421678	0.502826
Average							0.0422725	0.0777021	0.33884	0.583458
Crenarchaeota	Anaerobe	287	2404	4210	4202	5	0.00118765	0.0415882	0.348355	0.610057
Crenarchaeota	Aerobe	154	2492	4255	4244	40	0.00940071	0.0223156	0.361107	0.616577
Crenarchaeota	Hyperthermophile	90	1685	5126	5119	145	0.0282872	0.0130416	0.244168	0.742791
Crenarchaeota	Thermophile	163	1951	4787	4781	149	0.031126	0.0236198	0.282713	0.693668
Crenarchaeota	Mesophile	382	1562	4957	4956	0	0	0.0553543	0.226344	0.718302
Crenarchaeota	Host	398	2620	3883	3878	28	0.00721092	0.0576728	0.379655	0.562672
Crenarchaeota	Soil	138	3718	3045	3042	0	0	0.0199971	0.538762	0.44124
Crenarchaeota	Aquatic	52	3608	3241	3229	89	0.0274607	0.00753514	0.522823	0.469642
Crenarchaeota	GC	126	3302	3473	3464	11	0.00316729	0.0182582	0.478481	0.50326
Average							0.0119823	0.0288203	0.375823	0.595357
Euryarchaeota	Anaerobe	621	2111	4169	4089	547	0.131207	0.089987	0.305898	0.604115
Euryarchaeota	Aerobe	542	2162	4197	4136	5	0.00119133	0.0785393	0.313288	0.608173
Euryarchaeota	Hyperthermophile	577	1589	4735	4693	151	0.0318902	0.0836111	0.230256	0.686132
Euryarchaeota	Thermophile	507	1878	4516	4486	142	0.0314438	0.0734676	0.272134	0.654398
Euryarchaeota	Mesophile	803	1446	4652	4632	5	0.00107481	0.11636	0.209535	0.674105
Euryarchaeota	Host	901	2261	3739	3708	2	0.000534902	0.130561	0.327634	0.541806
Euryarchaeota	Soil	434	3425	3042	2975	34	0.0111769	0.0628894	0.496305	0.440806
Euryarchaeota	Aquatic	180	3458	3263	3170	250	0.0766166	0.0260832	0.501087	0.47283
Euryarchaeota	GC	511	2938	3452	3388	6	0.00173812	0.0740472	0.425735	0.500217
Average							0.0318748	0.0817273	0.34243	0.575842
Cyanobacteria	Anaerobe	477	2357	4067	4029	0	0	0.0691204	0.341545	0.589335
Cyanobacteria	Aerobe	384	2427	4090	4056	68	0.0166259	0.0556441	0.351688	0.592668
Cyanobacteria	Hyperthermophile	578	1669	4654	4645	0	0	0.083756	0.241849	0.674395
Cyanobacteria	Thermophile	410	1921	4570	4554	14	0.00306346	0.0594117	0.278365	0.662223
Cyanobacteria	Mesophile	532	1555	4814	4803	7	0.00145409	0.0770903	0.22533	0.69758
Cyanobacteria	Host	539	2483	3879	3844	0	0	0.0781046	0.359803	0.562092
Cyanobacteria	Soil	185	3590	3126	3043	59	0.018874	0.0268077	0.520214	0.452978
Cyanobacteria	Aquatic	133	3489	3279	3202	65	0.0198231	0.0192726	0.505579	0.475149
Cyanobacteria	GC	328	3101	3472	3406	4	0.00115207	0.0475293	0.449355	0.503115
Average							0.00677696	0.0574152	0.363748	0.578837
Firmicutes	Anaerobe	281	2446	4174	4164	56	0.0134164	0.0407187	0.354441	0.60484
Firmicutes	Aerobe	212	2464	4225	4205	0	0	0.0307202	0.35705	0.61223
Firmicutes	Hyperthermophile	430	1669	4802	4797	0	0	0.0623098	0.241849	0.695841
Firmicutes	Thermophile	251	1939	4711	4703	36	0.00764169	0.0363715	0.280974	0.682655
Firmicutes	Mesophile	326	1594	4981	4974	0	0	0.0472395	0.230981	0.721779
Firmicutes	Host	283	2640	3978	3947	10	0.00251383	0.0410085	0.382553	0.576438
Firmicutes	Soil	115	3665	3121	3083	40	0.0128164	0.0166643	0.531082	0.452253
Firmicutes	Aquatic	79	3544	3278	3246	1	0.000305064	0.0114476	0.513549	0.475004
Firmicutes	GC	201	3228	3472	3444	8	0.00230415	0.0291262	0.467758	0.503115
Average							0.00433306	0.0350674	0.37336	0.591573
Planctomycetes	Anaerobe	462	2421	4018	3988	0	0	0.0669468	0.350819	0.582234
Planctomycetes	Aerobe	390	2475	4036	4010	21	0.00520317	0.0565135	0.358644	0.584843
Planctomycetes	Hyperthermophile	626	1675	4600	4596	0	0	0.0907115	0.242718	0.66657
Planctomycetes	Thermophile	431	1928	4542	4530	0	0	0.0624547	0.27938	0.658165
Planctomycetes	Mesophile	549	1583	4769	4755	49	0.0102747	0.0795537	0.229387	0.691059
Planctomycetes	Host	431	2602	3868	3833	0	0	0.0624547	0.377047	0.560498
Planctomycetes	Soil	194	3598	3109	3029	0	0	0.0281119	0.521374	0.450514
Planctomycetes	Aquatic	169	3505	3227	3162	133	0.0412148	0.0244892	0.507897	0.467613
Planctomycetes	GC	358	3189	3354	3304	95	0.0283244	0.0518765	0.462107	0.486017
Average							0.00944633	0.0581236	0.36993	0.571946
Proteobacteria	Anaerobe	1039	2017	3845	3781	17	0.00442133	0.150558	0.292276	0.557166
Proteobacteria	Aerobe	739	2243	3919	3832	81	0.0206685	0.107086	0.325025	0.567889
Proteobacteria	Hyperthermophile	1233	1613	4055	4045	0	0	0.17867	0.233734	0.587596
Proteobacteria	Thermophile	867	1886	4148	4113	0	0	0.125634	0.273294	0.601072
Proteobacteria	Mesophile	1078	1486	4337	4319	44	0.0101453	0.156209	0.215331	0.62846
Proteobacteria	Host	831	2059	4011	3799	258	0.0643231	0.120417	0.298363	0.58122
Proteobacteria	Soil	373	3344	3184	2988	125	0.0392588	0.0540501	0.484567	0.461382
Proteobacteria	Aquatic	302	3316	3283	3140	8	0.0024368	0.0437618	0.48051	0.475728
Proteobacteria	GC	684	2870	3347	3222	265	0.0791754	0.0991161	0.415882	0.485002
Average							0.0244921	0.115056	0.335443	0.549502
Beta.proteobacteria	Anaerobe	523	2288	4090	4079	0	0	0.0757861	0.331546	0.592668
Beta.proteobacteria	Aerobe	357	2374	4170	4137	12	0.0028777	0.0517316	0.344008	0.60426
Beta.proteobacteria	Hyperthermophile	546	1586	4769	4753	0	0	0.079119	0.229822	0.691059
Beta.proteobacteria	Thermophile	338	1849	4714	4671	0	0	0.0489784	0.267932	0.683089
Beta.proteobacteria	Mesophile	453	1498	4950	4912	69	0.0139394	0.0656427	0.21707	0.717287
Beta.proteobacteria	Host	460	2428	4013	3967	50	0.0124595	0.066657	0.351833	0.58151
Beta.proteobacteria	Soil	257	3520	3124	3075	13	0.00416133	0.037241	0.510071	0.452688
Beta.proteobacteria	Aquatic	152	3427	3322	3250	8	0.00240819	0.0220258	0.496595	0.48138
Beta.proteobacteria	GC	405	3094	3402	3379	23	0.00676073	0.0586871	0.448341	0.492972
Average							0.00473409	0.0562076	0.355246	0.588546
B) for slices
Taxonomical category	Lifestyle category	E(Taxon)>E(Lifest)	E(Taxon)<E(Lifest)	E(Taxon)==E(Lifest)	E(Taxon)==E(Lifest)=0	Identical partitions for equal E(Lifest) & E(Taxon)	% Identical partitions for equal E(Lifest) & E(Taxon)	% lifestyle slices	% taxonomical slices	% equally well structured slices
Archaea	Anaerobe	603	1798	4500	4379	517	0.114889	0.0873786	0.260542	0.652079
Archaea	Aerobe	467	1858	4576	4469	26	0.00568182	0.0676714	0.269236	0.663092
Archaea	Hyperthermophile	565	1382	4954	4867	257	0.0518773	0.0818722	0.200261	0.717867
Archaea	Thermophile	486	1537	4878	4811	339	0.0694957	0.0704246	0.222721	0.706854
Archaea	Mesophile	628	1234	5039	5001	3	0.000595356	0.0910013	0.178815	0.730184
Archaea	Host	808	1936	4157	4094	9	0.00216502	0.117084	0.280539	0.602376
Archaea	Soil	437	2828	3636	3525	17	0.00467547	0.0633242	0.409796	0.52688
Archaea	Aquatic	166	2823	3912	3744	373	0.0953476	0.0240545	0.409071	0.566874
Archaea	GC	529	2383	3989	3895	6	0.00150414	0.0766556	0.345312	0.578032
Average							0.0384701	0.0754963	0.286255	0.638249
Crenarchaeota	Anaerobe	241	2172	4488	4469	5	0.00111408	0.0349225	0.314737	0.650341
Crenarchaeota	Aerobe	127	2146	4628	4606	40	0.00864304	0.0184031	0.310969	0.670627
Crenarchaeota	Hyperthermophile	114	1521	5266	5248	145	0.0275351	0.0165193	0.220403	0.763078
Crenarchaeota	Thermophile	211	1633	5057	5049	149	0.0294641	0.0305753	0.236632	0.732792
Crenarchaeota	Mesophile	302	1388	5211	5202	0	0	0.0437618	0.20113	0.755108
Crenarchaeota	Host	354	2395	4152	4142	28	0.00674374	0.0512969	0.347051	0.601652
Crenarchaeota	Soil	134	3209	3558	3544	0	0	0.0194175	0.465005	0.515577
Crenarchaeota	Aquatic	59	3049	3793	3770	89	0.0234643	0.00854949	0.44182	0.54963
Crenarchaeota	GC	117	2785	3999	3976	11	0.00275069	0.0169541	0.403565	0.579481
Average							0.0110795	0.0267111	0.326813	0.646476
Euryarchaeota	Anaerobe	591	1849	4461	4357	547	0.122618	0.0856398	0.267932	0.646428
Euryarchaeota	Aerobe	509	1829	4563	4477	5	0.00109577	0.0737574	0.265034	0.661209
Euryarchaeota	Hyperthermophile	550	1400	4951	4869	151	0.0304989	0.0796986	0.202869	0.717432
Euryarchaeota	Thermophile	546	1530	4825	4750	142	0.0294301	0.079119	0.221707	0.699174
Euryarchaeota	Mesophile	705	1281	4915	4878	5	0.00101729	0.102159	0.185625	0.712216
Euryarchaeota	Host	857	1972	4072	4014	2	0.000491159	0.124185	0.285756	0.590059
Euryarchaeota	Soil	452	2859	3590	3487	34	0.00947075	0.0654978	0.414288	0.520214
Euryarchaeota	Aquatic	208	2837	3856	3710	250	0.064834	0.0301406	0.4111	0.55876
Euryarchaeota	GC	522	2397	3982	3902	6	0.00150678	0.0756412	0.347341	0.577018
Average							0.0289959	0.0795376	0.289072	0.63139
Cyanobacteria	Anaerobe	382	2119	4400	4343	0	0	0.0553543	0.307057	0.637589
Cyanobacteria	Aerobe	333	2109	4459	4410	68	0.0152501	0.0482539	0.305608	0.646138
Cyanobacteria	Hyperthermophile	507	1526	4868	4855	0	0	0.0734676	0.221127	0.705405
Cyanobacteria	Thermophile	392	1608	4901	4880	14	0.00285656	0.0568034	0.23301	0.710187
Cyanobacteria	Mesophile	466	1386	5049	5037	7	0.00138641	0.0675264	0.20084	0.731633
Cyanobacteria	Host	451	2248	4202	4127	0	0	0.0653528	0.32575	0.608897
Cyanobacteria	Soil	181	3098	3622	3526	59	0.0162893	0.0262281	0.44892	0.524851
Cyanobacteria	Aquatic	135	2935	3831	3733	65	0.0169668	0.0195624	0.425301	0.555137
Cyanobacteria	GC	284	2621	3996	3911	4	0.001001	0.0411535	0.3798	0.579047
Average							0.00597225	0.0504114	0.316379	0.633209
Firmicutes	Anaerobe	250	2180	4471	4440	56	0.0125252	0.0362266	0.315896	0.647877
Firmicutes	Aerobe	175	2117	4609	4568	0	0	0.0253586	0.306767	0.667874
Firmicutes	Hyperthermophile	396	1524	4981	4971	0	0	0.057383	0.220838	0.721779
Firmicutes	Thermophile	264	1617	5020	5005	36	0.00717131	0.0382553	0.234314	0.727431
Firmicutes	Mesophile	319	1404	5178	5166	0	0	0.0462252	0.203449	0.750326
Firmicutes	Host	259	2404	4238	4195	10	0.0023596	0.0375308	0.348355	0.614114
Firmicutes	Soil	117	3164	3620	3568	40	0.0110497	0.0169541	0.458484	0.524562
Firmicutes	Aquatic	64	2987	3850	3797	1	0.00025974	0.00927402	0.432836	0.55789
Firmicutes	GC	181	2727	3993	3949	8	0.00200351	0.0262281	0.39516	0.578612
Average							0.00392989	0.032604	0.324011	0.643385
Planctomycetes	Anaerobe	362	2155	4384	4336	0	0	0.0524562	0.312274	0.63527
Planctomycetes	Aerobe	326	2132	4443	4405	21	0.00472654	0.0472395	0.308941	0.64382
Planctomycetes	Hyperthermophile	530	1527	4844	4835	0	0	0.0768005	0.221272	0.701927
Planctomycetes	Thermophile	381	1607	4913	4891	0	0	0.0552094	0.232865	0.711926
Planctomycetes	Mesophile	488	1404	5009	5004	49	0.00978239	0.0707144	0.203449	0.725837
Planctomycetes	Host	356	2343	4202	4140	0	0	0.0515867	0.339516	0.608897
Planctomycetes	Soil	176	3088	3637	3541	0	0	0.0255036	0.447471	0.527025
Planctomycetes	Aquatic	157	2952	3792	3716	133	0.0350738	0.0227503	0.427764	0.549486
Planctomycetes	GC	294	2704	3903	3848	95	0.0243403	0.0426025	0.391827	0.56557
Average							0.00821367	0.0494292	0.320598	0.629973
Proteobacteria	Anaerobe	895	1762	4244	4135	17	0.00400566	0.129691	0.255325	0.614983
Proteobacteria	Aerobe	671	1972	4258	4168	81	0.019023	0.0972323	0.285756	0.617012
Proteobacteria	Hyperthermophile	1075	1484	4342	4315	0	0	0.155775	0.215041	0.629184
Proteobacteria	Thermophile	839	1573	4489	4442	0	0	0.121577	0.227938	0.650485
Proteobacteria	Mesophile	1005	1341	4555	4535	44	0.00965971	0.145631	0.19432	0.660049
Proteobacteria	Host	744	1831	4326	4085	258	0.0596394	0.10781	0.265324	0.626866
Proteobacteria	Soil	344	2834	3723	3485	125	0.0335751	0.0498478	0.410665	0.539487
Proteobacteria	Aquatic	253	2734	3914	3684	8	0.00204394	0.0366614	0.396174	0.567164
Proteobacteria	GC	612	2390	3899	3731	265	0.0679661	0.0886828	0.346327	0.564991
Average							0.0217681	0.103656	0.288541	0.607802
Beta.proteobacteria	Anaerobe	407	2076	4418	4387	0	0	0.058977	0.300826	0.640197
Beta.proteobacteria	Aerobe	268	2076	4557	4497	12	0.00263331	0.038835	0.300826	0.660339
Beta.proteobacteria	Hyperthermophile	444	1475	4982	4958	0	0	0.0643385	0.213737	0.721924
Beta.proteobacteria	Thermophile	298	1558	5045	4987	0	0	0.0431821	0.225764	0.731053
Beta.proteobacteria	Mesophile	384	1351	5166	5127	69	0.0133566	0.0556441	0.195769	0.748587
Beta.proteobacteria	Host	367	2235	4299	4217	50	0.0116306	0.0531807	0.323866	0.622953
Beta.proteobacteria	Soil	205	3049	3647	3560	13	0.00356457	0.0297058	0.44182	0.528474
Beta.proteobacteria	Aquatic	118	2887	3896	3788	8	0.00205339	0.017099	0.418345	0.564556
Beta.proteobacteria	GC	328	2638	3935	3884	23	0.00584498	0.0475293	0.382263	0.570207
Average							0.0043426	0.0453879	0.311469	0.643144
	Plots of the average structure (y-axis) for 8 taxonomical categories (x-axis)

## Sheet: only NUTs
A) For trees
Taxonomical category	Lifestyle category	E(Taxon)>E(Lifest)	E(Taxon)<E(Lifest)	E(Taxon)==E(Lifest)	E(Taxon)==E(Lifest)=0	Identical partitions for equal E(Lifest) & E(Taxon)	% Identical partitions for equal E(Lifest) & E(Taxon)	% lifestyle trees	% taxonomical trees	% equally well structured trees
Archaea	Anaerobe	0	114	0	0	0	0	0	1	0
Archaea	Aerobe	0	114	0	0	0	0	0	1	0
Archaea	Hyperthermophile	4	110	0	0	0	0	0.0350877	0.964912	0
Archaea	Thermophile	0	114	0	0	0	0	0	1	0
Archaea	Mesophile	12	102	0	0	0	0	0.105263	0.894737	0
Archaea	Host	1	113	0	0	0	0	0.00877193	0.991228	0
Archaea	Soil	0	114	0	0	0	0	0	1	0
Archaea	Aquatic	0	114	0	0	0	0	0	1	0
Archaea	GC	0	114	0	0	0	0	0	1	0
Average							0	0.0165692	0.983431	0
Crenarchaeota	Anaerobe	0	114	0	0	0	0	0	1	0
Crenarchaeota	Aerobe	0	114	0	0	0	0	0	1	0
Crenarchaeota	Hyperthermophile	3	111	0	0	0	0	0.0263158	0.973684	0
Crenarchaeota	Thermophile	0	114	0	0	0	0	0	1	0
Crenarchaeota	Mesophile	6	108	0	0	0	0	0.0526316	0.947368	0
Crenarchaeota	Host	0	114	0	0	0	0	0	1	0
Crenarchaeota	Soil	0	114	0	0	0	0	0	1	0
Crenarchaeota	Aquatic	0	114	0	0	0	0	0	1	0
Crenarchaeota	GC	0	114	0	0	0	0	0	1	0
Average							0	0.00877193	0.991228	0
Euryarchaeota	Anaerobe	0	114	0	0	0	0	0	1	0
Euryarchaeota	Aerobe	0	114	0	0	0	0	0	1	0
Euryarchaeota	Hyperthermophile	5	109	0	0	0	0	0.0438596	0.95614	0
Euryarchaeota	Thermophile	0	114	0	0	0	0	0	1	0
Euryarchaeota	Mesophile	11	103	0	0	0	0	0.0964912	0.903509	0
Euryarchaeota	Host	0	114	0	0	0	0	0	1	0
Euryarchaeota	Soil	0	114	0	0	0	0	0	1	0
Euryarchaeota	Aquatic	0	114	0	0	0	0	0	1	0
Euryarchaeota	GC	0	114	0	0	0	0	0	1	0
Average							0	0.0155945	0.984405	0
Cyanobacteria	Anaerobe	0	114	0	0	0	0	0	1	0
Cyanobacteria	Aerobe	0	114	0	0	0	0	0	1	0
Cyanobacteria	Hyperthermophile	2	112	0	0	0	0	0.0175439	0.982456	0
Cyanobacteria	Thermophile	0	114	0	0	0	0	0	1	0
Cyanobacteria	Mesophile	5	109	0	0	0	0	0.0438596	0.95614	0
Cyanobacteria	Host	0	114	0	0	0	0	0	1	0
Cyanobacteria	Soil	0	114	0	0	0	0	0	1	0
Cyanobacteria	Aquatic	0	114	0	0	0	0	0	1	0
Cyanobacteria	GC	0	114	0	0	0	0	0	1	0
Average							0	0.00682261	0.993177	0
Firmicutes	Anaerobe	0	114	0	0	0	0	0	1	0
Firmicutes	Aerobe	0	114	0	0	0	0	0	1	0
Firmicutes	Hyperthermophile	2	112	0	0	0	0	0.0175439	0.982456	0
Firmicutes	Thermophile	0	114	0	0	0	0	0	1	0
Firmicutes	Mesophile	9	105	0	0	0	0	0.0789474	0.921053	0
Firmicutes	Host	0	114	0	0	0	0	0	1	0
Firmicutes	Soil	0	114	0	0	0	0	0	1	0
Firmicutes	Aquatic	0	114	0	0	0	0	0	1	0
Firmicutes	GC	0	114	0	0	0	0	0	1	0
Average							0	0.0107212	0.989279	0
Planctomycetes	Anaerobe	1	113	0	0	0	0	0.00877193	0.991228	0
Planctomycetes	Aerobe	0	114	0	0	0	0	0	1	0
Planctomycetes	Hyperthermophile	1	113	0	0	0	0	0.00877193	0.991228	0
Planctomycetes	Thermophile	0	114	0	0	0	0	0	1	0
Planctomycetes	Mesophile	1	113	0	0	0	0	0.00877193	0.991228	0
Planctomycetes	Host	0	114	0	0	0	0	0	1	0
Planctomycetes	Soil	0	114	0	0	0	0	0	1	0
Planctomycetes	Aquatic	0	114	0	0	0	0	0	1	0
Planctomycetes	GC	0	114	0	0	0	0	0	1	0
Average							0	0.00292398	0.997076	0
Proteobacteria	Anaerobe	1	113	0	0	0	0	0.00877193	0.991228	0
Proteobacteria	Aerobe	0	114	0	0	0	0	0	1	0
Proteobacteria	Hyperthermophile	9	105	0	0	0	0	0.0789474	0.921053	0
Proteobacteria	Thermophile	0	114	0	0	0	0	0	1	0
Proteobacteria	Mesophile	17	97	0	0	0	0	0.149123	0.850877	0
Proteobacteria	Host	1	113	0	0	0	0	0.00877193	0.991228	0
Proteobacteria	Soil	1	113	0	0	0	0	0.00877193	0.991228	0
Proteobacteria	Aquatic	0	114	0	0	0	0	0	1	0
Proteobacteria	GC	0	114	0	0	0	0	0	1	0
Average							0	0.0282651	0.971735	0
Beta.proteobacteria	Anaerobe	1	113	0	0	0	0	0.00877193	0.991228	0
Beta.proteobacteria	Aerobe	0	114	0	0	0	0	0	1	0
Beta.proteobacteria	Hyperthermophile	2	112	0	0	0	0	0.0175439	0.982456	0
Beta.proteobacteria	Thermophile	0	114	0	0	0	0	0	1	0
Beta.proteobacteria	Mesophile	4	110	0	0	0	0	0.0350877	0.964912	0
Beta.proteobacteria	Host	0	114	0	0	0	0	0	1	0
Beta.proteobacteria	Soil	0	114	0	0	0	0	0	1	0
Beta.proteobacteria	Aquatic	0	114	0	0	0	0	0	1	0
Beta.proteobacteria	GC	0	114	0	0	0	0	0	1	0
Average						0	0	0.00682261	0.993177	0
B) for clans
Taxonomical category	Lifestyle category	E(Taxon)>E(Lifest)	E(Taxon)<E(Lifest)	E(Taxon)==E(Lifest)	E(Taxon)==E(Lifest)=0	Identical partitions for equal E(Lifest) & E(Taxon)	% Identical partitions for equal E(Lifest) & E(Taxon)	% lifestyle clans	% taxonomical clans	% equally well structured clans
Archaea	Anaerobe	6	108	0	0	0	0	0.0526316	0.947368	0
Archaea	Aerobe	4	110	0	0	0	0	0.0350877	0.964912	0
Archaea	Hyperthermophile	4	110	0	0	0	0	0.0350877	0.964912	0
Archaea	Thermophile	3	111	0	0	0	0	0.0263158	0.973684	0
Archaea	Mesophile	5	109	0	0	0	0	0.0438596	0.95614	0
Archaea	Host	7	107	0	0	0	0	0.0614035	0.938596	0
Archaea	Soil	5	109	0	0	0	0	0.0438596	0.95614	0
Archaea	Aquatic	2	112	0	0	0	0	0.0175439	0.982456	0
Archaea	GC	6	108	0	0	0	0	0.0526316	0.947368	0
Average							0	0.0409357	0.959064	0
Crenarchaeota	Anaerobe	2	112	0	0	0	0	0.0175439	0.982456	0
Crenarchaeota	Aerobe	2	112	0	0	0	0	0.0175439	0.982456	0
Crenarchaeota	Hyperthermophile	2	112	0	0	0	0	0.0175439	0.982456	0
Crenarchaeota	Thermophile	1	113	0	0	0	0	0.00877193	0.991228	0
Crenarchaeota	Mesophile	2	112	0	0	0	0	0.0175439	0.982456	0
Crenarchaeota	Host	2	112	0	0	0	0	0.0175439	0.982456	0
Crenarchaeota	Soil	2	112	0	0	0	0	0.0175439	0.982456	0
Crenarchaeota	Aquatic	2	112	0	0	0	0	0.0175439	0.982456	0
Crenarchaeota	GC	2	112	0	0	0	0	0.0175439	0.982456	0
Average							0	0.0165692	0.983431	0
Euryarchaeota	Anaerobe	3	111	0	0	0	0	0.0263158	0.973684	0
Euryarchaeota	Aerobe	2	112	0	0	0	0	0.0175439	0.982456	0
Euryarchaeota	Hyperthermophile	3	111	0	0	0	0	0.0263158	0.973684	0
Euryarchaeota	Thermophile	2	112	0	0	0	0	0.0175439	0.982456	0
Euryarchaeota	Mesophile	3	111	0	0	0	0	0.0263158	0.973684	0
Euryarchaeota	Host	3	111	0	0	0	0	0.0263158	0.973684	0
Euryarchaeota	Soil	2	112	0	0	0	0	0.0175439	0.982456	0
Euryarchaeota	Aquatic	2	112	0	0	0	0	0.0175439	0.982456	0
Euryarchaeota	GC	2	112	0	0	0	0	0.0175439	0.982456	0
Average							0	0.0214425	0.978558	0
Cyanobacteria	Anaerobe	2	112	0	0	0	0	0.0175439	0.982456	0
Cyanobacteria	Aerobe	1	113	0	0	0	0	0.00877193	0.991228	0
Cyanobacteria	Hyperthermophile	2	112	0	0	0	0	0.0175439	0.982456	0
Cyanobacteria	Thermophile	1	113	0	0	0	0	0.00877193	0.991228	0
Cyanobacteria	Mesophile	1	113	0	0	0	0	0.00877193	0.991228	0
Cyanobacteria	Host	1	113	0	0	0	0	0.00877193	0.991228	0
Cyanobacteria	Soil	1	113	0	0	0	0	0.00877193	0.991228	0
Cyanobacteria	Aquatic	1	113	0	0	0	0	0.00877193	0.991228	0
Cyanobacteria	GC	1	113	0	0	0	0	0.00877193	0.991228	0
Average							0	0.0107212	0.989279	0
Firmicutes	Anaerobe	2	112	0	0	0	0	0.0175439	0.982456	0
Firmicutes	Aerobe	2	112	0	0	0	0	0.0175439	0.982456	0
Firmicutes	Hyperthermophile	3	111	0	0	0	0	0.0263158	0.973684	0
Firmicutes	Thermophile	2	112	0	0	0	0	0.0175439	0.982456	0
Firmicutes	Mesophile	2	112	0	0	0	0	0.0175439	0.982456	0
Firmicutes	Host	3	111	0	0	0	0	0.0263158	0.973684	0
Firmicutes	Soil	2	112	0	0	0	0	0.0175439	0.982456	0
Firmicutes	Aquatic	2	112	0	0	0	0	0.0175439	0.982456	0
Firmicutes	GC	3	111	0	0	0	0	0.0263158	0.973684	0
Average							0	0.0204678	0.979532	0
Planctomycetes	Anaerobe	0	114	0	0	0	0	0	1	0
Planctomycetes	Aerobe	0	114	0	0	0	0	0	1	0
Planctomycetes	Hyperthermophile	0	114	0	0	0	0	0	1	0
Planctomycetes	Thermophile	0	114	0	0	0	0	0	1	0
Planctomycetes	Mesophile	0	114	0	0	0	0	0	1	0
Planctomycetes	Host	0	114	0	0	0	0	0	1	0
Planctomycetes	Soil	0	114	0	0	0	0	0	1	0
Planctomycetes	Aquatic	0	114	0	0	0	0	0	1	0
Planctomycetes	GC	0	114	0	0	0	0	0	1	0
Average							0	0	1	0
Proteobacteria	Anaerobe	3	111	0	0	0	0	0.0263158	0.973684	0
Proteobacteria	Aerobe	1	113	0	0	0	0	0.00877193	0.991228	0
Proteobacteria	Hyperthermophile	5	109	0	0	0	0	0.0438596	0.95614	0
Proteobacteria	Thermophile	0	114	0	0	0	0	0	1	0
Proteobacteria	Mesophile	2	112	0	0	0	0	0.0175439	0.982456	0
Proteobacteria	Host	4	110	0	0	0	0	0.0350877	0.964912	0
Proteobacteria	Soil	1	113	0	0	0	0	0.00877193	0.991228	0
Proteobacteria	Aquatic	0	114	0	0	0	0	0	1	0
Proteobacteria	GC	2	112	0	0	0	0	0.0175439	0.982456	0
Average							0	0.0175439	0.982456	0
Beta.proteobacteria	Anaerobe	7	107	0	0	0	0	0.0614035	0.938596	0
Beta.proteobacteria	Aerobe	5	109	0	0	0	0	0.0438596	0.95614	0
Beta.proteobacteria	Hyperthermophile	7	107	0	0	0	0	0.0614035	0.938596	0
Beta.proteobacteria	Thermophile	4	110	0	0	0	0	0.0350877	0.964912	0
Beta.proteobacteria	Mesophile	5	109	0	0	0	0	0.0438596	0.95614	0
Beta.proteobacteria	Host	7	107	0	0	0	0	0.0614035	0.938596	0
Beta.proteobacteria	Soil	6	108	0	0	0	0	0.0526316	0.947368	0
Beta.proteobacteria	Aquatic	4	110	0	0	0	0	0.0350877	0.964912	0
Beta.proteobacteria	GC	5	109	0	0	0	0	0.0438596	0.95614	0
Average							0	0.0487329	0.951267	0
B) for slices
Taxonomical category	Lifestyle category	E(Taxon)>E(Lifest)	E(Taxon)<E(Lifest)	E(Taxon)==E(Lifest)	E(Taxon)==E(Lifest)=0	Identical partitions for equal E(Lifest) & E(Taxon)	% Identical partitions for equal E(Lifest) & E(Taxon)	% lifestyle slices	% taxonomical slices	% equally well structured slices
Archaea	Anaerobe	8	106	0	0	0	0	0.0701754	0.929825	0
Archaea	Aerobe	4	110	0	0	0	0	0.0350877	0.964912	0
Archaea	Hyperthermophile	5	109	0	0	0	0	0.0438596	0.95614	0
Archaea	Thermophile	3	111	0	0	0	0	0.0263158	0.973684	0
Archaea	Mesophile	5	109	0	0	0	0	0.0438596	0.95614	0
Archaea	Host	11	103	0	0	0	0	0.0964912	0.903509	0
Archaea	Soil	6	108	0	0	0	0	0.0526316	0.947368	0
Archaea	Aquatic	2	112	0	0	0	0	0.0175439	0.982456	0
Archaea	GC	8	106	0	0	0	0	0.0701754	0.929825	0
Average							0	0.0506823	0.949318	0
Crenarchaeota	Anaerobe	2	112	0	0	0	0	0.0175439	0.982456	0
Crenarchaeota	Aerobe	2	112	0	0	0	0	0.0175439	0.982456	0
Crenarchaeota	Hyperthermophile	2	112	0	0	0	0	0.0175439	0.982456	0
Crenarchaeota	Thermophile	2	112	0	0	0	0	0.0175439	0.982456	0
Crenarchaeota	Mesophile	2	112	0	0	0	0	0.0175439	0.982456	0
Crenarchaeota	Host	2	112	0	0	0	0	0.0175439	0.982456	0
Crenarchaeota	Soil	2	112	0	0	0	0	0.0175439	0.982456	0
Crenarchaeota	Aquatic	2	112	0	0	0	0	0.0175439	0.982456	0
Crenarchaeota	GC	2	112	0	0	0	0	0.0175439	0.982456	0
Average							0	0.0175439	0.982456	0
Euryarchaeota	Anaerobe	6	108	0	0	0	0	0.0526316	0.947368	0
Euryarchaeota	Aerobe	4	110	0	0	0	0	0.0350877	0.964912	0
Euryarchaeota	Hyperthermophile	5	108	1	0	0	0	0.0438596	0.947368	0.00877193
Euryarchaeota	Thermophile	2	110	2	0	0	0	0.0175439	0.964912	0.0175439
Euryarchaeota	Mesophile	5	109	0	0	0	0	0.0438596	0.95614	0
Euryarchaeota	Host	10	104	0	0	0	0	0.0877193	0.912281	0
Euryarchaeota	Soil	6	108	0	0	0	0	0.0526316	0.947368	0
Euryarchaeota	Aquatic	4	110	0	0	0	0	0.0350877	0.964912	0
Euryarchaeota	GC	4	110	0	0	0	0	0.0350877	0.964912	0
Average							0	0.0448343	0.952242	0.00292398
Cyanobacteria	Anaerobe	3	111	0	0	0	0	0.0263158	0.973684	0
Cyanobacteria	Aerobe	2	112	0	0	0	0	0.0175439	0.982456	0
Cyanobacteria	Hyperthermophile	1	113	0	0	0	0	0.00877193	0.991228	0
Cyanobacteria	Thermophile	0	114	0	0	0	0	0	1	0
Cyanobacteria	Mesophile	2	112	0	0	0	0	0.0175439	0.982456	0
Cyanobacteria	Host	4	110	0	0	0	0	0.0350877	0.964912	0
Cyanobacteria	Soil	1	113	0	0	0	0	0.00877193	0.991228	0
Cyanobacteria	Aquatic	1	113	0	0	0	0	0.00877193	0.991228	0
Cyanobacteria	GC	2	112	0	0	0	0	0.0175439	0.982456	0
Average							0	0.0155945	0.984405	0
Firmicutes	Anaerobe	1	113	0	0	0	0	0.00877193	0.991228	0
Firmicutes	Aerobe	1	113	0	0	0	0	0.00877193	0.991228	0
Firmicutes	Hyperthermophile	1	113	0	0	0	0	0.00877193	0.991228	0
Firmicutes	Thermophile	0	113	1	0	0	0	0	0.991228	0.00877193
Firmicutes	Mesophile	1	112	1	0	0	0	0.00877193	0.982456	0.00877193
Firmicutes	Host	5	109	0	0	0	0	0.0438596	0.95614	0
Firmicutes	Soil	1	113	0	0	0	0	0.00877193	0.991228	0
Firmicutes	Aquatic	1	113	0	0	0	0	0.00877193	0.991228	0
Firmicutes	GC	1	113	0	0	0	0	0.00877193	0.991228	0
Average							0	0.0116959	0.986355	0.00194932
Planctomycetes	Anaerobe	2	112	0	0	0	0	0.0175439	0.982456	0
Planctomycetes	Aerobe	0	114	0	0	0	0	0	1	0
Planctomycetes	Hyperthermophile	1	113	0	0	0	0	0.00877193	0.991228	0
Planctomycetes	Thermophile	0	114	0	0	0	0	0	1	0
Planctomycetes	Mesophile	0	114	0	0	0	0	0	1	0
Planctomycetes	Host	3	111	0	0	0	0	0.0263158	0.973684	0
Planctomycetes	Soil	0	114	0	0	0	0	0	1	0
Planctomycetes	Aquatic	0	114	0	0	0	0	0	1	0
Planctomycetes	GC	1	113	0	0	0	0	0.00877193	0.991228	0
Average							0	0.00682261	0.993177	0
Proteobacteria	Anaerobe	5	109	0	0	0	0	0.0438596	0.95614	0
Proteobacteria	Aerobe	0	114	0	0	0	0	0	1	0
Proteobacteria	Hyperthermophile	1	113	0	0	0	0	0.00877193	0.991228	0
Proteobacteria	Thermophile	0	114	0	0	0	0	0	1	0
Proteobacteria	Mesophile	1	113	0	0	0	0	0.00877193	0.991228	0
Proteobacteria	Host	5	109	0	0	0	0	0.0438596	0.95614	0
Proteobacteria	Soil	2	112	0	0	0	0	0.0175439	0.982456	0
Proteobacteria	Aquatic	0	114	0	0	0	0	0	1	0
Proteobacteria	GC	2	112	0	0	0	0	0.0175439	0.982456	0
Average							0	0.0155945	0.984405	0
Beta.proteobacteria	Anaerobe	6	108	0	0	0	0	0.0526316	0.947368	0
Beta.proteobacteria	Aerobe	5	109	0	0	0	0	0.0438596	0.95614	0
Beta.proteobacteria	Hyperthermophile	7	107	0	0	0	0	0.0614035	0.938596	0
Beta.proteobacteria	Thermophile	5	109	0	0	0	0	0.0438596	0.95614	0
Beta.proteobacteria	Mesophile	5	108	1	0	0	0	0.0438596	0.947368	0.00877193
Beta.proteobacteria	Host	8	106	0	0	0	0	0.0701754	0.929825	0
Beta.proteobacteria	Soil	6	108	0	0	0	0	0.0526316	0.947368	0
Beta.proteobacteria	Aquatic	6	108	0	0	0	0	0.0526316	0.947368	0
Beta.proteobacteria	GC	6	108	0	0	0	0	0.0526316	0.947368	0
Average							0	0.0526316	0.946394	0.000974659
	Plots of the average structure (y-axis) for 8 taxonomical categories (x-axis)
