# Supplementary material for: Harvesting Evolutionary Signals in a Forest of Prokaryotic Gene Trees
Source: Oxford University Press journal article supplement (doi:10.1093/molbev/msq323), 2010-12-20

### A) Numbers and proportions of largest clips identified in 6901 trees

|                                        | Homogeneous clips<br>Archaea only | Homogeneous clips<br># of trees concerned | Homogeneous clips<br>Bacteria only | Homogeneous clips<br># of trees concerned | Heterogeneous clips<br>Bacteria and Archaea | Heterogeneous clips<br># of trees concerned |
|----------------------------------------|-----------------------------------|-------------------------------------------|------------------------------------|-------------------------------------------|---------------------------------------------|---------------------------------------------|
| Pattern A                              | 24,60%                            | 927                                       | 75,40%                             | 2842                                      | NA                                          | 0                                           |
| Pattern B                              | 22,72%                            | 167                                       | 52,24%                             | 384                                       | 25,03%                                      | 184                                         |
| Pattern C                              | 30,71%                            | 195                                       | 46,61%                             | 296                                       | 22,68%                                      | 144                                         |
| Pattern D                              | 24,35%                            | 149                                       | 37,91%                             | 232                                       | 37,75%                                      | 231                                         |
| Pattern E                              | 25,02%                            | 285                                       | 40,65%                             | 463                                       | 34,33%                                      | 391                                         |
| <b>Average % for long distance LGT</b> | 24,03%                            |                                           | 43,60%                             |                                           | <b>32,37%</b>                               |                                             |

### B) Functional categories for the 184 heterogeneous largest clips

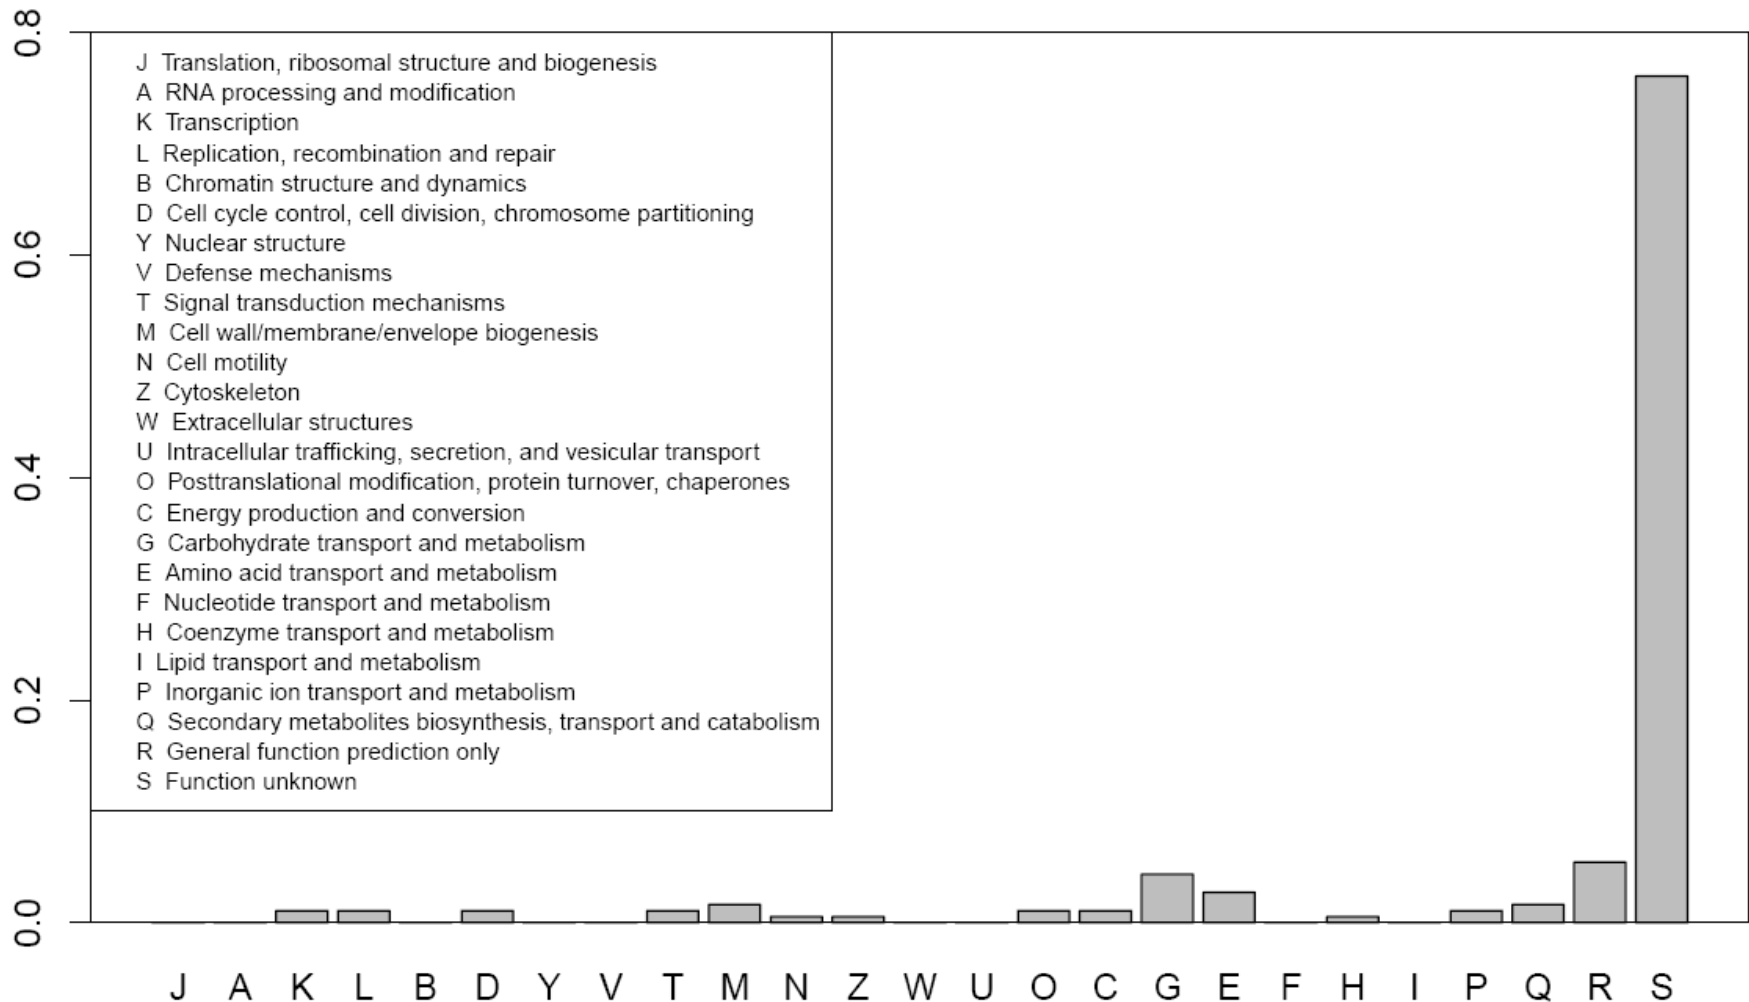

Supplement: msq323_Supplementary_Data.zip [file msq323_Supplementary_Data.zip › mbe-10-0656-File011.pdf]
