# Supplementary material for: Harvesting Evolutionary Signals in a Forest of Prokaryotic Gene Trees
Source: Oxford University Press journal article supplement (doi:10.1093/molbev/msq323), 2010-12-20
Supplement: msq323_Supplementary_Data.zip [file msq323_Supplementary_Data.zip › mbe-10-0656-File013.txt]

List of species
---------------
In the following partitions, species are ordered as following. Species included in the partitions are indicated by a star (*)
	1	Censy
	2	Aerpe
	3	Hypbu
	4	Stama
	5	Sulac
	6	Sulso
	7	Sulto
	8	Calma
	9	Pyrae
	10	Pyrca
	11	Pyris
	12	Thepe
	13	Thete
	14	Uncme
	15	Arcfu
	16	Halma
	17	Halsp
	18	Halwa
	19	Natph
	20	Metth
	21	Metst
	22	Metja
	23	MetmC
	24	Metmp
	25	Metla
	26	Metcu
	27	Methu
	28	Metka
	29	Metbu
	30	Metsa
	31	Metac
	32	Metba
	33	Metma
	34	Pyrab
	35	Pyrfu
	36	Pyrho
	37	Theko
	38	Picto
	39	Theac
	40	Thevo
	41	Naneq
	42	Aciba01Bi
	43	Solus01Bi
	44	Myctu01Ba
	45	Biflo01Ba
	46	Rubxy01Ba
	47	Aquae01Bq
	48	Bacth01Bb
	49	Flajo01Bb
	50	Cythu01Bb
	51	CanPr01Bv
	52	Chltr01Bv
	53	Chlpn01Bv
	54	Chlte01Bb
	55	Provi01Bb
	56	Chlau01Bh
	57	Dehsp01Bh
	58	Synsp01Bc
	59	Theel01Bc
	60	Glovi01Bc
	61	Anava01Bc
	62	Nossp01Bc
	63	Trier01Bc
	64	Proma01Bc
	65	Acama01Bc
	66	Deira01Bd
	67	Theth01Bd
	68	Bacsu01Bf
	69	Cloac01Bf
	70	Mesfl01Bf
	71	Lacca01Bf
	72	Mooth01Bf
	73	Fusnu01Bu
	74	Lenar01Bv
	75	Vicva01Bv
	76	Blama01Bo
	77	Gemob01Bo
	78	Plama01Bo
	79	Rhoba01Bo
	80	Agrtu01Bp
	81	Metex01Bp
	82	Ricpr01Bp
	83	Burma01Bp
	84	Metpe01Bp
	85	Metfl01Bp
	86	Neime01Bp
	87	Desvu01Bp
	88	Myxxa01Bp
	89	Helpy01Bp
	90	Sulsp02Bp
	91	Escco01Bp
	92	Metca01Bp
	93	Pseae01Bp
	94	Borbu01Bs
	95	Lepin01Bs
	96	Trepa01Bs
	97	Ferno01Bt
	98	Thema01Bt
	99	Opiba01Bv
	100	Versp01Bv
I) ADAPTATIVE LIFESTYLE MODULES
-------------------------------
##############################################################################
COG1464	Inorganic ion transport and metabolism
	Mesophi	____________________________________________*___*_*_*______________**_*_*______*__*__*_**_*_*__*____
COG2011	Inorganic ion transport and metabolism
	Mesophi	____________________________________________*___*_*_*____________*__*_*_*______*__*__*_**_*_*__*____
##############################################################################
COG1020	Secondary metabolites biosynthesis, transport and catabolism
	Aerobe	______________________________________________________________________*_____________________________
	Mesophi	__________________________________________**____*___________***_*__*__*____*__***_*____*__***_______
COG3321	Secondary metabolites biosynthesis, transport and catabolism
	Aerobe	_________________________________________***_______________****_*__*_______**_***_*____*___*________
	Mesophi	_________________________________________***_______________***__*__**______**_***_*____*___*________
##############################################################################
COG1054	General function prediction only
	Aerobe	________________________________________________*****____*__**_***_*_____*____**_**_*_____*_*_*_____
	Mesophi	________________________________________________*****____*__**_**__*_____*____**_****_____*_*_*_____
COG3145	Replication, recombination and repair
	Aerobe	_________________________________________***____***______*__**_**________*__*__*__*_*__*__***_______
	Mesophi	_________________________________________***____***______*__**_**___________*__*__***__*__***_______
COG3555	Posttranslational modification, protein turnover, chaperones
	Aerobe	_________________________________________*______***________*_**_*_________________*____*____*_______
	Mesophi	_________________________________________*______***________*_**_*_________________**________*_______
##############################################################################
COG1107	Replication, recombination and repair
	Anaerob	_____________**____******************_______________________________________________________________
	Aerobe	_______________****_________________________________________________________________________________
COG1326	General function prediction only
	Anaerob	_____________**____******************_______________________________________________________________
	Aerobe	_______________****_________________________________________________________________________________
COG1784	Function unknown
	Anaerob	_____________**__*_******************___*___________________________________________________________
	Aerobe	_______________**_*_________________________________________________________________________________
COG1885	Function unknown
	Anaerob	_____________**______****************_______________________________________________________________
	Aerobe	_______________****_________________________________________________________________________________
COG1967	Function unknown
	Anaerob	_____________**____*_******_*********___*___________________________________________________________
	Aerobe	_______________****_________________________________________________________________________________
COG3365	Function unknown
	Anaerob	_____________**____*____*********___________________________________________________________________
	Aerobe	_______________****_________________________________________________________________________________
##############################################################################
COG1346	Cell wall/membrane/envelope biogenesis
	Hyperth	_________________________________****_______________________________________________________________
	Thermop	______________________________*******__________*_______*________**_**___*_______*_*__*____*_*_______
COG1380	General function prediction only
	Hyperth	_________________________________****_______________________________________________________________
	Thermop	______________________________*******__________*_______*________**_**___*_______*_*__*____*_*_______
##############################################################################
COG1365	General function prediction only
	Hyperth	____________________****___*_____****_______________________________________________________________
	Thermop	___________________*****_________****_______________________________________________________________
	Aquatic	_____________________***___*_____****_______________________________________________________________
COG1627	Function unknown
	Hyperth	____________________****___*_____****_______________________________________________________________
	Thermop	___________________*****_________****_______________________________________________________________
	Aquatic	_____________________***___*_____****_______________________________________________________________
COG1710	Function unknown
	Hyperth	____________________****_________****_______________________________________________________________
	Thermop	______________________*_____________________________________________________________________________
	Aquatic	_____________________***_________****_______________________________________________________________
COG1771	Function unknown
	Hyperth	____________________****_________****_______________________________________________________________
	Thermop	______________________*_____________________________________________________________________________
	Aquatic	_____________________***_________****_______________________________________________________________
COG1822	Function unknown
	Hyperth	____________________****_________****_______________________________________________________________
	Thermop	______________________*_____________________________________________________________________________
	Aquatic	_____________________***_________****_______________________________________________________________
COG1991	Function unknown
	Hyperth	____________________****_________****_______________________________________________________________
	Thermop	______________________*_____________________________________________________________________________
	Aquatic	_____________________***_________****_______________________________________________________________
COG4009	Function unknown
	Hyperth	____________________****___*________________________________________________________________________
	Thermop	___________________*****____________________________________________________________________________
	Aquatic	_____________________***___*________________________________________________________________________
COG4010	Function unknown
	Hyperth	____________________****___*________________________________________________________________________
	Thermop	___________________*****____________________________________________________________________________
	Aquatic	_____________________***___*________________________________________________________________________
COG4053	Function unknown
	Hyperth	____________________****___*________________________________________________________________________
	Thermop	___________________*****____________________________________________________________________________
	Aquatic	_____________________***___*________________________________________________________________________
COG4071	Function unknown
	Hyperth	____________________****___*________________________________________________________________________
	Thermop	___________________*****____________________________________________________________________________
	Aquatic	_____________________***___*________________________________________________________________________
COG4077	Function unknown
	Hyperth	_____________________***___*________________________________________________________________________
	Thermop	___________________*****____________________________________________________________________________
	Aquatic	_____________________***___*________________________________________________________________________
##############################################################################
COG4007	General function prediction only
	Hyperth	_____________________***___*________________________________________________________________________
	Thermop	___________________*_***____________________________________________________________________________
COG4013	Function unknown
	Hyperth	_____________________***___*________________________________________________________________________
	Thermop	___________________*_***____________________________________________________________________________
COG4024	Function unknown
	Hyperth	_____________________***___*________________________________________________________________________
	Thermop	___________________*_***____________________________________________________________________________
COG4035	Function unknown
	Hyperth	_____________________***___*________________________________________________________________________
	Thermop	___________________*_***____________________________________________________________________________
COG4039	Function unknown
	Hyperth	_____________________***___*________________________________________________________________________
	Thermop	___________________*_***____________________________________________________________________________
COG4042	Function unknown
	Hyperth	_____________________***___*________________________________________________________________________
	Thermop	___________________*_***____________________________________________________________________________
##############################################################################
COG4022	Function unknown
	Hyperth	_____________________***___*________________________________________________________________________
COG4052	General function prediction only
	Hyperth	_____________________***___*________________________________________________________________________
COG4059	Coenzyme transport and metabolism
	Hyperth	_____________________***___*________________________________________________________________________
COG4062	Coenzyme transport and metabolism
	Hyperth	____________________****___*________________________________________________________________________
COG4065	Function unknown
	Hyperth	_____________________***___*________________________________________________________________________
COG4090	Function unknown
	Hyperth	_____________________***___*________________________________________________________________________
##############################################################################
COG1777	Transcription
	Thermop	_____________********____**__***********____________________________________________________________
COG2811	Energy production and conversion
	Thermop	_____________********____**__*******_____________________________*__________________________________
##############################################################################
COG2927	Replication, recombination and repair
	Aerobe	__________________________________________________*____________________________****_**____***_______
	Mesophi	__________________________________________________*____________________________*******_____**_______
COG3047	Cell wall/membrane/envelope biogenesis
	Aerobe	__________________________________________________*____________________________****_*__*__*_*_______
	Mesophi	__________________________________________________*____________________________*****___*__*_*_______
##############################################################################
COG2441	Energy production and conversion
	Hyperth	_**__**_______*__________________****_______________________________________*_______________________
NOG21874	Function unknown
	Hyperth	__**_**_______*__________________****_______________________________________________________________
##############################################################################
COG2914	Function unknown
	Aerobe	__________________________________________________________________________________*_**_____**_______
COG2980	Cell wall/membrane/envelope biogenesis
	Aerobe	__________________________________________________________________________________*_**____***_______
COG3150	General function prediction only
	Aerobe	__________________________________________________________________________________*_*_____***_______
COG3317	Cell wall/membrane/envelope biogenesis
	Aerobe	__________________________________________________________________________________*_**____***_______
##############################################################################
COG4463	Transcription
	Anaerob	____________________________________________________________________*__*____________________________
COG4472	Function unknown
	Anaerob	____________________________________________________________________*__*____________________________
##############################################################################
COG3143	Cell motility
	Aerobe	__________________________________________________________________________________*_*_____*_*_______
	Aquatic	___________________________________________________________________________________*________*_______
COG4787	Cell motility
	Aerobe	__________________________________________________________________________________*_*_____*_*_______
	Aquatic	___________________________________________________________________________________*________*_______
##############################################################################
COG3352	Cell motility
	Anaerob	_____________________***____*____****_**____________________________________________________________
	Aerobe	_______________**_*_________________________________________________________________________________
	Thermop	_______________**_*__***_________****_**____________________________________________________________
COG3353	Cell motility
	Anaerob	_____________________***____*____****_**____________________________________________________________
	Aerobe	_______________**_*_________________________________________________________________________________
	Thermop	_______________**_*__***_________****_**____________________________________________________________
COG3354	Cell motility
	Anaerob	_____________________***____*____****_**____________________________________________________________
	Aerobe	_______________**_*_________________________________________________________________________________
	Thermop	_______________**_*__***_________****_**____________________________________________________________
##############################################################################
NOG09568	Function unknown
	Soil	_______________________________**___________________________________________________________________
	Aquatic	___________*________________*_*_____________________________________________________________________
NOG09676	Function unknown
	Soil	_______________________________**___________________________________________________________________
	Aquatic	___________*________________*_*_____________________________________________________________________
NOG13580	Function unknown
	Soil	_______________________________**___________________________________________________________________
	Aquatic	____________________________*_*_____________________________________________________________________
NOG13599	General function prediction only
	Soil	_______________________________**___________________________________________________________________
	Aquatic	____________________________*_*_____________________________________________________________________
NOG13602	Function unknown
	Soil	_______________________________**___________________________________________________________________
	Aquatic	____________________________*_*_____________________________________________________________________
NOG13605	Function unknown
	Soil	_______________________________**___________________________________________________________________
	Aquatic	____________________________*_*_____________________________________________________________________
NOG17615	Function unknown
	Soil	_______________________________**___________________________________________________________________
	Aquatic	____________________________*_*_____________________________________________________________________
NOG17645	Function unknown
	Soil	_______________________________**___________________________________________________________________
	Aquatic	____________________________*_*_____________________________________________________________________
NOG17648	Function unknown
	Soil	_______________________________**___________________________________________________________________
	Aquatic	____________________________*_*_____________________________________________________________________
NOG17764	Function unknown
	Soil	_______________________________**___________________________________________________________________
	Aquatic	____________________________*_*_____________________________________________________________________
##############################################################################
COG3444	Carbohydrate transport and metabolism
	Anaerob	___________*_______________________________________________________**_*_*_____________*___*_________
COG3715	Carbohydrate transport and metabolism
	Anaerob	___________*_______________________________________________________**_*_*_________________*_________
COG3716	Carbohydrate transport and metabolism
	Anaerob	___________*_______________________________________________________**_*_*_____________*___*_________
##############################################################################
COG3562	Cell wall/membrane/envelope biogenesis
	Mesophi	________________________________________________________________________________*__*_*___*__________
	Soil	________________________________________________________________________________*_*_________________
COG3563	Cell wall/membrane/envelope biogenesis
	Mesophi	________________________________________________________________________________*_**_____*__________
	Soil	________________________________________________________________________________*_*_________________
##############################################################################
COG3580	Function unknown
	Anaerob	________________________*_*_________________*__*____________________*__**________________________*__
	Aerobe	__________________________________________*___*_____________________________________________________
	Thermop	__________________________*____________________________________________*_________________________*__
COG3581	Function unknown
	Anaerob	________________________*_*___*_____________*__*____________________*__**________________________*__
	Aerobe	__________________________________________*___*_____________________________________________________
	Thermop	_______________________________________________________________________*_________________________*__
##############################################################################
COG4745	Posttranslational modification, protein turnover, chaperones
	Anaerob	______________*_________***___***______________________*____________________________________________
	Aerobe	_______________****_________________________________________________________________________________
	Thermop	______________*****______**___***______________________*____________________________________________
COG5427	Function unknown
	Anaerob	_____________**_________***___***______________________*____________________________________________
	Aerobe	_______________****_________________________________________________________________________________
	Thermop	_____________******______**___***______________________*____________________________________________
##############################################################################
COG4004	Function unknown
	Anaerob	_____________**_________***_*****_____**____________________________________________________________
	Thermop	______________*______________*_______***____________________________________________________________
COG4738	Transcription
	Anaerob	_____________**__________**_*****_____**____________________________________________________________
	Thermop	_____________**__________**__****____***____________________________________________________________
COG4860	Function unknown
	Anaerob	_____________**__________**_*****_____**____________________________________________________________
	Thermop	_____________**__________**__*_______***____________________________________________________________
##############################################################################
COG4016	Function unknown
	Hyperth	_____________________***___*________________________________________________________________________
COG4017	Function unknown
	Hyperth	_____________________***___*________________________________________________________________________
COG4018	Function unknown
	Hyperth	_____________________***___*________________________________________________________________________
COG4078	Function unknown
	Hyperth	_____________________***___*________________________________________________________________________
##############################################################################
COG4213	Carbohydrate transport and metabolism
	Thermop	____________________________________________*__________*_______________*_______*__________*_____*___
COG4214	Carbohydrate transport and metabolism
	Thermop	____________________________________________*__________*_______________*_______*________________*___
##############################################################################
COG4830	Translation, ribosomal structure and biogenesis
	Thermop	_************_______________________________________________________________________________________
COG4901	Translation, ribosomal structure and biogenesis
	Thermop	_************_______________________________________________________________________________________
##############################################################################
COG4888	General function prediction only
	Aerobe	_*_********_*_______________________________________________________________________________________
	Hyperth	_***_******_*_______________________________________________________________________________________
COG4914	General function prediction only
	Aerobe	_*_********_*_______________________________________________________________________________________
	Hyperth	_***_******_*_______________________________________________________________________________________
##############################################################################
COG5491	Cell motility
	Aerobe	**_****_____________________________________________________________________________________________
NOG14520	Function unknown
	Aerobe	**_****_____________________________________________________________________________________________
##############################################################################
NOG04774	Function unknown
	Anaerob	_________________*_*______*_____*______________________*____________________________________________
	Aerobe	____________________________________________________________*_______________*_______________________
	Thermop	_________________*_*______*_____*______________________*____*_______________*_______________________
NOG08485	Function unknown
	Anaerob	*________________*_*______*_____*______________________*____________________________________________
	Aerobe	____________________________________________________________*_______________*_______________________
	Thermop	_________________*_*______*_____*______________________*____*_______________*_______________________
##############################################################################
NOG07697	Function unknown
	Aerobe	_______*__________________________________*________________________________*_**_____________________
	Mesophi	__________________________________________*_______________________________*___*_____________________
NOG08501	Function unknown
	Aerobe	_______*__________________________________*________________________________*_**_____________________
	Mesophi	__________________________________________*_______________________________*___*_____________________
##############################################################################
NOG13559	Function unknown
	Thermop	___________________****_____________________________________________________________________________
	Aquatic	_____________________***____________________________________________________________________________
NOG17588	Function unknown
	Thermop	___________________****_____________________________________________________________________________
	Aquatic	_____________________***____________________________________________________________________________
NOG22408	Function unknown
	Thermop	___________________****_____________________________________________________________________________
	Aquatic	_____________________***____________________________________________________________________________
##############################################################################
NOG13677	Function unknown
	Aerobe	________________________________________________**__________________________________________________
	Soil	________________________________________________**__________________________________________________
NOG13702	Function unknown
	Aerobe	________________________________________________**__________________________________________________
	Soil	________________________________________________**__________________________________________________
NOG17827	Function unknown
	Aerobe	________________________________________________**__________________________________________________
	Soil	________________________________________________**__________________________________________________
NOG26630	Function unknown
	Aerobe	________________________________________________**__________________________________________________
	Soil	________________________________________________**__________________________________________________
##############################################################################
COG0829	Posttranslational modification, protein turnover, chaperones
	Aerobe	*_____*________*_**_____________________________**_______**_***_**_____________**_*_*___*___*_______
	Euryarc	_______________*_**_________________________________________________________________________________
COG2371	Posttranslational modification, protein turnover, chaperones
	Aerobe	*_____*________*_**_____________________________*________**_***_**_____________**_*_*___*___*_______
	Euryarc	_______________*_**_________________________________________________________________________________
##############################################################################
COG2867	Lipid transport and metabolism
	Aerobe	_______________________________________________________________________________****_**____***_______
	Mesophi	_______________________________________________________________________________*******_____**_______
	Beta.pr	__________________________________________________________________________________****______________
COG2917	Cell cycle control, cell division, chromosome partitioning
	Aerobe	_______________________________________________________________________________****_**____***_______
	Mesophi	_______________________________________________________________________________*******_____**_______
	Beta.pr	__________________________________________________________________________________****______________
##############################################################################
COG2969	General function prediction only
	Aerobe	__________________________________________________________________________________*_**____***_______
	Beta.pr	__________________________________________________________________________________****______________
COG3026	Signal transduction mechanisms
	Aerobe	__________________________________________________________________________________*_*_____***_______
	Beta.pr	__________________________________________________________________________________***_______________
COG3159	Function unknown
	Aerobe	__________________________________________________________________________________*_*_____***_______
	Beta.pr	__________________________________________________________________________________***_______________
COG4137	General function prediction only
	Aerobe	__________________________________________________________________________________*_**____***_______
	Beta.pr	__________________________________________________________________________________****______________
NOG17162	Function unknown
	Aerobe	__________________________________________________________________________________*_*_____*_*_______
	Beta.pr	__________________________________________________________________________________***_______________
##############################################################################
COG3583	Function unknown
	Anaerob	____________________________________________*______________________**__*____________________________
	Host	___________________________________________**_______________________________________________________
	Soil	___________________________________________________________________**_______________________________
	Firmicu	___________________________________________________________________**__*____________________________
COG3879	Function unknown
	Anaerob	____________________________________________*______________________**__*____________________________
	Host	___________________________________________**_______________________________________________________
	Soil	___________________________________________________________________**_______________________________
	Firmicu	___________________________________________________________________**__*____________________________
##############################################################################
COG2966	Function unknown
	Mesophi	_______________________________*___________**__*____________________*_*_*_____*________*__*_______*_
COG3610	Function unknown
	Mesophi	_______________________________*___________**__*____________________*_*_*_____*________*__*_______*_
##############################################################################
COG1100	General function prediction only
	Aerobe	__________________________________________________________*_*****__________*________________________
	Soil	____________________________________________________________**______________________________________
COG4360	Nucleotide transport and metabolism
	Aerobe	____________________________________________________________***_*___________________________________
	Soil	____________________________________________________________**______________________________________
COG4678	Carbohydrate transport and metabolism
	Aerobe	_________________________________________________________**_***_*___________________________________
	Soil	____________________________________________________________**______________________________________
NOG07674	Function unknown
	Aerobe	__________________________________________________________*_***_*___________________________________
	Soil	____________________________________________________________**______________________________________
NOG07678	Function unknown
	Aerobe	_______________________________________________________________*____________________________________
	Soil	____________________________________________________________**______________________________________
NOG07686	Function unknown
	Aerobe	_______________________________________________________________*____________________________________
	Soil	____________________________________________________________**______________________________________
NOG07692	Function unknown
	Aerobe	_________________________________________________________*__________________________________________
	Soil	____________________________________________________________**______________________________________
NOG08450	Function unknown
	Aerobe	__________________________________________________________*_***_____________________________________
	Soil	___________________________________________________________***______________________________________
NOG08460	Function unknown
	Aerobe	*___________________________________________________________***_____________________________________
	Soil	___________________________________________________________***______________________________________
NOG08461	Function unknown
	Aerobe	__________________________________________________________*_**__*___________________________________
	Soil	____________________________________________________________**______________________________________
NOG08466	Function unknown
	Aerobe	__________________________________________________________*_________________________________________
	Soil	____________________________________________________________**______________________________________
NOG08468	Function unknown
	Aerobe	_________________________________________________________*__________________________________________
	Soil	____________________________________________________________**______________________________________
NOG08470	Function unknown
	Aerobe	__________________________________________________________*_***_*___________________________________
	Soil	____________________________________________________________**______________________________________
NOG08471	Function unknown
	Aerobe	__________________________________________________________*_________________________________________
	Soil	____________________________________________________________**______________________________________
NOG09001	Function unknown
	Aerobe	___________________________________________________________***__*___________________________________
	Soil	___________________________________________________________***______________________________________
NOG09425	Function unknown
	Aerobe	____________________________________________________________**______________________________________
	Soil	___________________________________________________________***______________________________________
NOG09426	Function unknown
	Aerobe	___________________________________________________________*________________________________________
	Soil	___________________________________________________________***______________________________________
NOG09429	Function unknown
	Aerobe	____________________________________________________________***_____________________________________
	Soil	____________________________________________________________**______________________________________
NOG09434	Function unknown
	Aerobe	__________________________________________________________*_***_*___________________________________
	Soil	____________________________________________________________**______________________________________
NOG09435	Function unknown
	Aerobe	__________________________________________________________*_________________________________________
	Soil	____________________________________________________________**______________________________________
NOG09439	Function unknown
	Aerobe	___________________________________________________________*________________________________________
	Soil	___________________________________________________________***______________________________________
NOG09441	Function unknown
	Aerobe	_________________________________________________________*__________________________________________
	Soil	____________________________________________________________**______________________________________
NOG09445	Function unknown
	Aerobe	_________________________________________________________**_***_*___________________________________
	Soil	___________________________________________________________***______________________________________
NOG09446	Function unknown
	Aerobe	_________________________________________________________*__________________________________________
	Soil	___________________________________________________________***______________________________________
NOG09477	Function unknown
	Aerobe	__________________________________________________________*_***_*___________________________________
	Soil	____________________________________________________________**______________________________________
NOG10728	Intracellular trafficking, secretion, and vesicular transport
	Aerobe	_________________________________________________________*__***_*___________________________________
	Soil	____________________________________________________________**______________________________________
NOG10731	Function unknown
	Aerobe	__________________________________________________________*****_*___________________________________
	Soil	___________________________________________________________***______________________________________
NOG10737	Function unknown
	Aerobe	__________________________________________________________*_________________________________________
	Soil	____________________________________________________________**______________________________________
NOG10738	Function unknown
	Aerobe	__________________________________________________________*_________________________________________
	Soil	____________________________________________________________**______________________________________
NOG10746	Function unknown
	Aerobe	_________________________________________________________*__***_*___________________________________
	Soil	____________________________________________________________**______________________________________
NOG10750	Function unknown
	Aerobe	__________________________________________________________*_***_*___________________________________
	Soil	____________________________________________________________**______________________________________
NOG10754	Function unknown
	Aerobe	__________________________________________________________*_***_*___________________________________
	Soil	____________________________________________________________**______________________________________
NOG10761	Function unknown
	Aerobe	__________________________________________________________*_________________________________________
	Soil	____________________________________________________________**______________________________________
NOG10766	Function unknown
	Aerobe	__________________________________________________________*_****____________________________________
	Soil	____________________________________________________________**______________________________________
NOG10771	Function unknown
	Aerobe	_________________________________________________________*__________________________________________
	Soil	____________________________________________________________**______________________________________
NOG10772	Function unknown
	Aerobe	_________________________________________________________*__*****___________________________________
	Soil	____________________________________________________________**______________________________________
NOG10788	Function unknown
	Aerobe	__________________________________________________________*_***_*___________________________________
	Soil	____________________________________________________________**______________________________________
NOG10792	Replication, recombination and repair
	Aerobe	__________________________________________________________*_***_*___________________________________
	Soil	____________________________________________________________**______________________________________
NOG10801	Function unknown
	Aerobe	__________________________________________________________*_***_*___________________________________
	Soil	____________________________________________________________**______________________________________
NOG10808	General function prediction only
	Aerobe	_________________________________________________________*__________________________________________
	Soil	____________________________________________________________**______________________________________
NOG10809	Function unknown
	Aerobe	__________________________________________________________*_________________________________________
	Soil	____________________________________________________________**______________________________________
NOG10811	Function unknown
	Aerobe	_______________________________________________________________*____________________________________
	Soil	____________________________________________________________**______________________________________
NOG10815	Function unknown
	Aerobe	_________________________________________________________*__***_*___________________________________
	Soil	____________________________________________________________**______________________________________
NOG10821	Function unknown
	Aerobe	__________________________________________________________*_________________________________________
	Soil	____________________________________________________________**______________________________________
NOG10823	Function unknown
	Aerobe	_________________________________________________________*__________________________________________
	Soil	____________________________________________________________**______________________________________
NOG10824	Function unknown
	Aerobe	_______________________________________________________________*____________________________________
	Soil	____________________________________________________________**______________________________________
NOG10846	Function unknown
	Aerobe	__________________________________________________________*_________________________________________
	Soil	____________________________________________________________**______________________________________
NOG10854	Function unknown
	Aerobe	_________________________________________________________*__________________________________________
	Soil	____________________________________________________________**______________________________________
NOG11711	Function unknown
	Aerobe	_________________________________________________________*__________________________________________
	Soil	___________________________________________________________**_______________________________________
NOG12509	Function unknown
	Aerobe	_________________________________________________________*__***_____________________________________
	Soil	____________________________________________________________**______________________________________
NOG12773	Function unknown
	Aerobe	__________________________________________________________*_***_*___________________________________
	Soil	____________________________________________________________**______________________________________
NOG12777	Function unknown
	Aerobe	__________________________________________________________*****_*___________________________________
	Soil	___________________________________________________________***______________________________________
NOG12781	Function unknown
	Aerobe	_________________________________________________________*__________________________________________
	Soil	____________________________________________________________**______________________________________
NOG12785	Function unknown
	Aerobe	_________________________________________________________*__________________________________________
	Soil	____________________________________________________________**______________________________________
NOG12788	Function unknown
	Aerobe	_________________________________________________________*_****_*___________________________________
	Soil	___________________________________________________________***______________________________________
NOG12794	Function unknown
	Aerobe	_______________________________________________________________*____________________________________
	Soil	____________________________________________________________**______________________________________
NOG12797	Function unknown
	Aerobe	__________________________________________________________*_**__*___________________________________
	Soil	____________________________________________________________**______________________________________
NOG12802	Function unknown
	Aerobe	__________________________________________________________*_***_*___________________________________
	Soil	____________________________________________________________**______________________________________
NOG12803	Function unknown
	Aerobe	____________________________________________________________**__*__________*________________________
	Soil	___________________________________________________________***______________________________________
NOG12808	Function unknown
	Aerobe	__________________________________________________________*_***_*___________________________________
	Soil	____________________________________________________________**______________________________________
NOG12809	Function unknown
	Aerobe	_________________________________________________________*__***_____________________________________
	Soil	____________________________________________________________**______________________________________
NOG12813	Function unknown
	Aerobe	__________________________________________________________*_________________________________________
	Soil	____________________________________________________________**______________________________________
NOG12822	Function unknown
	Aerobe	___________________________________________________________*________________________________________
	Soil	___________________________________________________________***______________________________________
NOG12826	Function unknown
	Aerobe	_________________________________________________________*__***_*___________________________________
	Soil	____________________________________________________________**______________________________________
NOG12835	Function unknown
	Aerobe	__________________________________________________________*_***_____________________________________
	Soil	____________________________________________________________**______________________________________
NOG12837	Function unknown
	Aerobe	__________________________________________________________*_***_*___________________________________
	Soil	____________________________________________________________**______________________________________
NOG12843	Function unknown
	Aerobe	_________________________________________________________*__________________________________________
	Soil	____________________________________________________________**______________________________________
NOG12860	Function unknown
	Aerobe	__________________________________________________________*_*****___________________________________
	Soil	____________________________________________________________**______________________________________
NOG12873	Function unknown
	Aerobe	__________________________________________________________*_________________________________________
	Soil	____________________________________________________________**______________________________________
NOG12876	Function unknown
	Aerobe	_________________________________________________________*__***_*___________________________________
	Soil	____________________________________________________________**______________________________________
NOG12916	Function unknown
	Aerobe	__________________________________________________________*_*****___________________________________
	Soil	____________________________________________________________**______________________________________
NOG12917	Function unknown
	Aerobe	_________________________________________________________*__*****___________________________________
	Soil	____________________________________________________________**______________________________________
NOG12922	Function unknown
	Aerobe	_________________________________________________________*__*****___________________________________
	Soil	____________________________________________________________**______________________________________
NOG12923	Function unknown
	Aerobe	_________________________________________________________**_***_*___________________________________
	Soil	____________________________________________________________**______________________________________
NOG12989	Function unknown
	Aerobe	_________________________________________________________******_*___________________________________
	Soil	___________________________________________________________***______________________________________
NOG16199	Function unknown
	Aerobe	__________________________________________________________*****_*___________________________________
	Soil	___________________________________________________________***______________________________________
NOG16200	Function unknown
	Aerobe	__________________________________________________________*_***_*___________________________________
	Soil	____________________________________________________________**______________________________________
NOG16209	Function unknown
	Aerobe	_________________________________________________________**_*****___________________________________
	Soil	___________________________________________________________***______________________________________
NOG16277	Function unknown
	Aerobe	__________________________________________________________*_***_*___________________________________
	Soil	____________________________________________________________**______________________________________
NOG16325	Function unknown
	Aerobe	__________________________________________________________*_***_*___________________________________
	Soil	____________________________________________________________**______________________________________
NOG16362	Function unknown
	Aerobe	_________________________________________________________*_****_*___________________________________
	Soil	___________________________________________________________***______________________________________
NOG16415	Function unknown
	Aerobe	__________________________________________________________*_*****___________________________________
	Soil	____________________________________________________________**______________________________________
NOG16432	Function unknown
	Aerobe	_________________________________________________________*__*****___________________________________
	Soil	____________________________________________________________**______________________________________
NOG16539	Function unknown
	Aerobe	_________________________________________________________*__*****___________________________________
	Soil	____________________________________________________________**______________________________________
NOG21497	Function unknown
	Aerobe	_________________________________________________________*__***_*___________________________________
	Soil	____________________________________________________________**______________________________________
NOG21671	Function unknown
	Aerobe	__________________________________________________________*_***_*___________*_______________________
	Soil	____________________________________________________________**______________________________________
NOG25999	Function unknown
	Aerobe	_________________________________________________________*_****_*___________________________________
	Soil	___________________________________________________________***______________________________________
NOG35153	Function unknown
	Aerobe	__________________________________________________________*_***_*___________________________________
	Soil	____________________________________________________________**______________________________________
NOG37379	Function unknown
	Aerobe	_________________________________________________________*__***_*___________________________________
	Soil	____________________________________________________________**______________________________________
NOG12919	Function unknown
	Aerobe	_______________________________________________________________*____________________________________
	Soil	____________________________________________________________**______________________________________
NOG12921	Function unknown
	Aerobe	__________________________________________________________*_________________________________________
	Soil	____________________________________________________________**______________________________________
NOG12883	Function unknown
	Aerobe	_________________________________________________________*__________________________________________
	Soil	____________________________________________________________**______________________________________
NOG12887	Function unknown
	Aerobe	__________________________________________________________*_________________________________________
	Soil	____________________________________________________________**______________________________________
NOG12889	Function unknown
	Aerobe	_________________________________________________________*__________________________________________
	Soil	____________________________________________________________**______________________________________
NOG12906	Function unknown
	Aerobe	_________________________________________________________*__________________________________________
	Soil	____________________________________________________________**______________________________________
NOG16219	Function unknown
	Aerobe	_________________________________________________________*__________________________________________
	Soil	____________________________________________________________**______________________________________
NOG16205	Function unknown
	Aerobe	__________________________________________________________*_________________________________________
	Soil	___________________________________________________________***______________________________________
NOG16257	Function unknown
	Aerobe	__________________________________________________________*_________________________________________
	Soil	____________________________________________________________**______________________________________
NOG16269	Function unknown
	Aerobe	_________________________________________________________*__________________________________________
	Soil	____________________________________________________________**______________________________________
NOG16297	Function unknown
	Aerobe	__________________________________________________________*_________________________________________
	Soil	____________________________________________________________**______________________________________
NOG16318	Function unknown
	Aerobe	__________________________________________________________*_________________________________________
	Soil	____________________________________________________________**______________________________________
NOG16334	Function unknown
	Aerobe	__________________________________________________________*_________________________________________
	Soil	____________________________________________________________**______________________________________
NOG16342	Function unknown
	Aerobe	___________________________________________________________*________________________________________
	Soil	___________________________________________________________***______________________________________
NOG16343	Function unknown
	Aerobe	__________________________________________________________*_________________________________________
	Soil	____________________________________________________________**______________________________________
NOG16345	Function unknown
	Aerobe	_________________________________________________________*__________________________________________
	Soil	____________________________________________________________**______________________________________
NOG16364	Function unknown
	Aerobe	__________________________________________________________*_________________________________________
	Soil	____________________________________________________________**______________________________________
NOG16367	Function unknown
	Aerobe	_________________________________________________________*__***_____________________________________
	Soil	____________________________________________________________**______________________________________
NOG16388	Function unknown
	Aerobe	__________________________________________________________*_________________________________________
	Soil	____________________________________________________________**______________________________________
NOG16407	Function unknown
	Aerobe	_________________________________________________________*__________________________________________
	Soil	____________________________________________________________**______________________________________
NOG04717	Function unknown
	Aerobe	_________________________________________________________*__________________________________________
	Soil	____________________________________________________________**______________________________________
NOG16453	Function unknown
	Aerobe	_________________________________________________________*__________________________________________
	Soil	____________________________________________________________**______________________________________
NOG04726	Function unknown
	Aerobe	_________________________________________________________*__________________________________________
	Soil	____________________________________________________________**______________________________________
NOG04730	Function unknown
	Aerobe	__________________________________________________________*_________________________________________
	Soil	____________________________________________________________**______________________________________
NOG04732	Function unknown
	Aerobe	__________________________________________________________*_________________________________________
	Soil	____________________________________________________________**______________________________________
NOG04734	Function unknown
	Aerobe	_______________________________________________________________*____________________________________
	Soil	____________________________________________________________**______________________________________
NOG04741	Function unknown
	Aerobe	__________________________________________________________*_________________________________________
	Soil	____________________________________________________________**______________________________________
NOG04743	Function unknown
	Aerobe	_________________________________________________________*__________________________________________
	Soil	____________________________________________________________**______________________________________
NOG04745	Function unknown
	Aerobe	__________________________________________________________*_________________________________________
	Soil	___________________________________________________________***______________________________________
NOG04759	Function unknown
	Aerobe	____________________________________________________________**______________________________________
	Soil	____________________________________________________________**______________________________________
NOG04776	Function unknown
	Aerobe	_________________________________________________________*__________________________________________
	Soil	____________________________________________________________**______________________________________
##############################################################################
COG4630	Nucleotide transport and metabolism
	Mesophi	__________________________________________*______________________*_____________*__**___*____*_______
COG4631	Nucleotide transport and metabolism
	Mesophi	__________________________________________*______________________*_____________**_**___*____*_______
##############################################################################
II) LINEAGE SPECIFIC LIFESTYLE MODULES
--------------------------------------
##############################################################################
COG4669	Intracellular trafficking, secretion, and vesicular transport
	Aerobe	__________________________________________________***_____________________________*____*____*_______
	Mesophi	__________________________________________________***_____________________________*____*____*_______
	Soil	__________________________________________________________________________________*___**____*_______
	Proteob	__________________________________________________________________________________*___**____*_______
COG4789	Intracellular trafficking, secretion, and vesicular transport
	Aerobe	__________________________________________________***_____________________________*____*____*_______
	Mesophi	__________________________________________________***_______________________________________________
	Soil	__________________________________________________________________________________*___**____*_______
	Proteob	__________________________________________________________________________________*___**____*_______
COG4790	Intracellular trafficking, secretion, and vesicular transport
	Aerobe	__________________________________________________*_*_____________________________*____*____*_______
	Mesophi	____________________________________________________________________________________________*_______
	Soil	__________________________________________________________________________________*___**____*_______
	Proteob	__________________________________________________________________________________*___**____*_______
COG4791	Intracellular trafficking, secretion, and vesicular transport
	Aerobe	__________________________________________________***_____________________________*____*____*_______
	Mesophi	__________________________________________________***_______________________________________________
	Soil	__________________________________________________________________________________*___**____*_______
	Proteob	__________________________________________________________________________________*___**____*_______
##############################################################################
COG1229	Energy production and conversion
	Anaerob	_____________**____**************___________________________________________________________________
	Euryarc	_____________**____**************___________________________________________________________________
COG2037	Energy production and conversion
	Anaerob	_____________**____**************___________________________________________________________________
	Euryarc	_____________**____**************___________________________________________________________________
##############################################################################
COG1411	General function prediction only
	Anaerob	_____________**____**************___________________________________________________________________
	Euryarc	_____________**____**************___________________________________________________________________
COG1891	Function unknown
	Anaerob	_____________**____**************___________________________________________________________________
	Euryarc	_____________**____**************___________________________________________________________________
##############################################################################
COG1029 Energy production and conversion
	Euryarc _____________**____**************___________________________________________________________________
	Anaerob _____________**____**************___________________________________________________________________
COG1795 Function unknown
	Euryarc _____________**____***__*********___________________________________________________________________
	Anaerob _____________**____***__*********___________________________________________________________________
##############################################################################
III) ANCIENT ADAPTATIVE MODULES
-------------------------------
##############################################################################
COG4597	Amino acid transport and metabolism
	Aerobe	____________________________________________________________*****______________*__________*_________
	Soil	____________________________________________________________**______________________________________
	Cyanoba	____________________________________________________________*****___________________________________
	Proteob	_______________________________________________________________________________*__________*_________
COG4735	Function unknown
	Aerobe	_________________________________________________________*__***_*_______________________*_*_________
	Soil	____________________________________________________________**______________________________________
	Cyanoba	_________________________________________________________**_***_*___________________________________
	Proteob	________________________________________________________________________________________*_*_________
##############################################################################
NOG08481
	Cyanoba	_________________________________________________________********___________________________________
	Plancto ___________________________________________________________________________*_*______________________
	Aerobe _________________________________________________________********_*________*_*______________________
NOG10748
	Cyanoba _________________________________________________________*__**__*___________________________________
	Plancto ___________________________________________________________________________*_*______________________
	Aerobe _________________________________________________________*__**__*_*________*_*______________________
##############################################################################
NOG14866
	Euryarc _________________________________****_______________________________________________________________
	Plancto ___________________________________________________________________________****_____________________
	Aquatic _________________________________****______________________________________****_____________________
NOG16899
	Euryarc _________________________________****_______________________________________________________________
	Plancto ____________________________________________________________________________**______________________
	Aquatic _________________________________****_______________________________________**______________________
##############################################################################
NOG21718
	Cyanobac ____________________________________________________________**______________________________________
	Planctom ___________________________________________________________________________*__*_____________________
	Aerobe ____________________________________________________________**____*________*__*_______________*_____
NOG21817
	Cyanobac ____________________________________________________________*_*_____________________________________
	Planctom ____________________________________________________________________________*_*_____________________
	Aerobe	____________________________________________________________*_*_____________*_*_____________*_______
##############################################################################
