# Supplementary figures and images for: Harvesting Evolutionary Signals in a Forest of Prokaryotic Gene Trees
Source: Oxford University Press journal article supplement (doi:10.1093/molbev/msq323), 2010-12-20

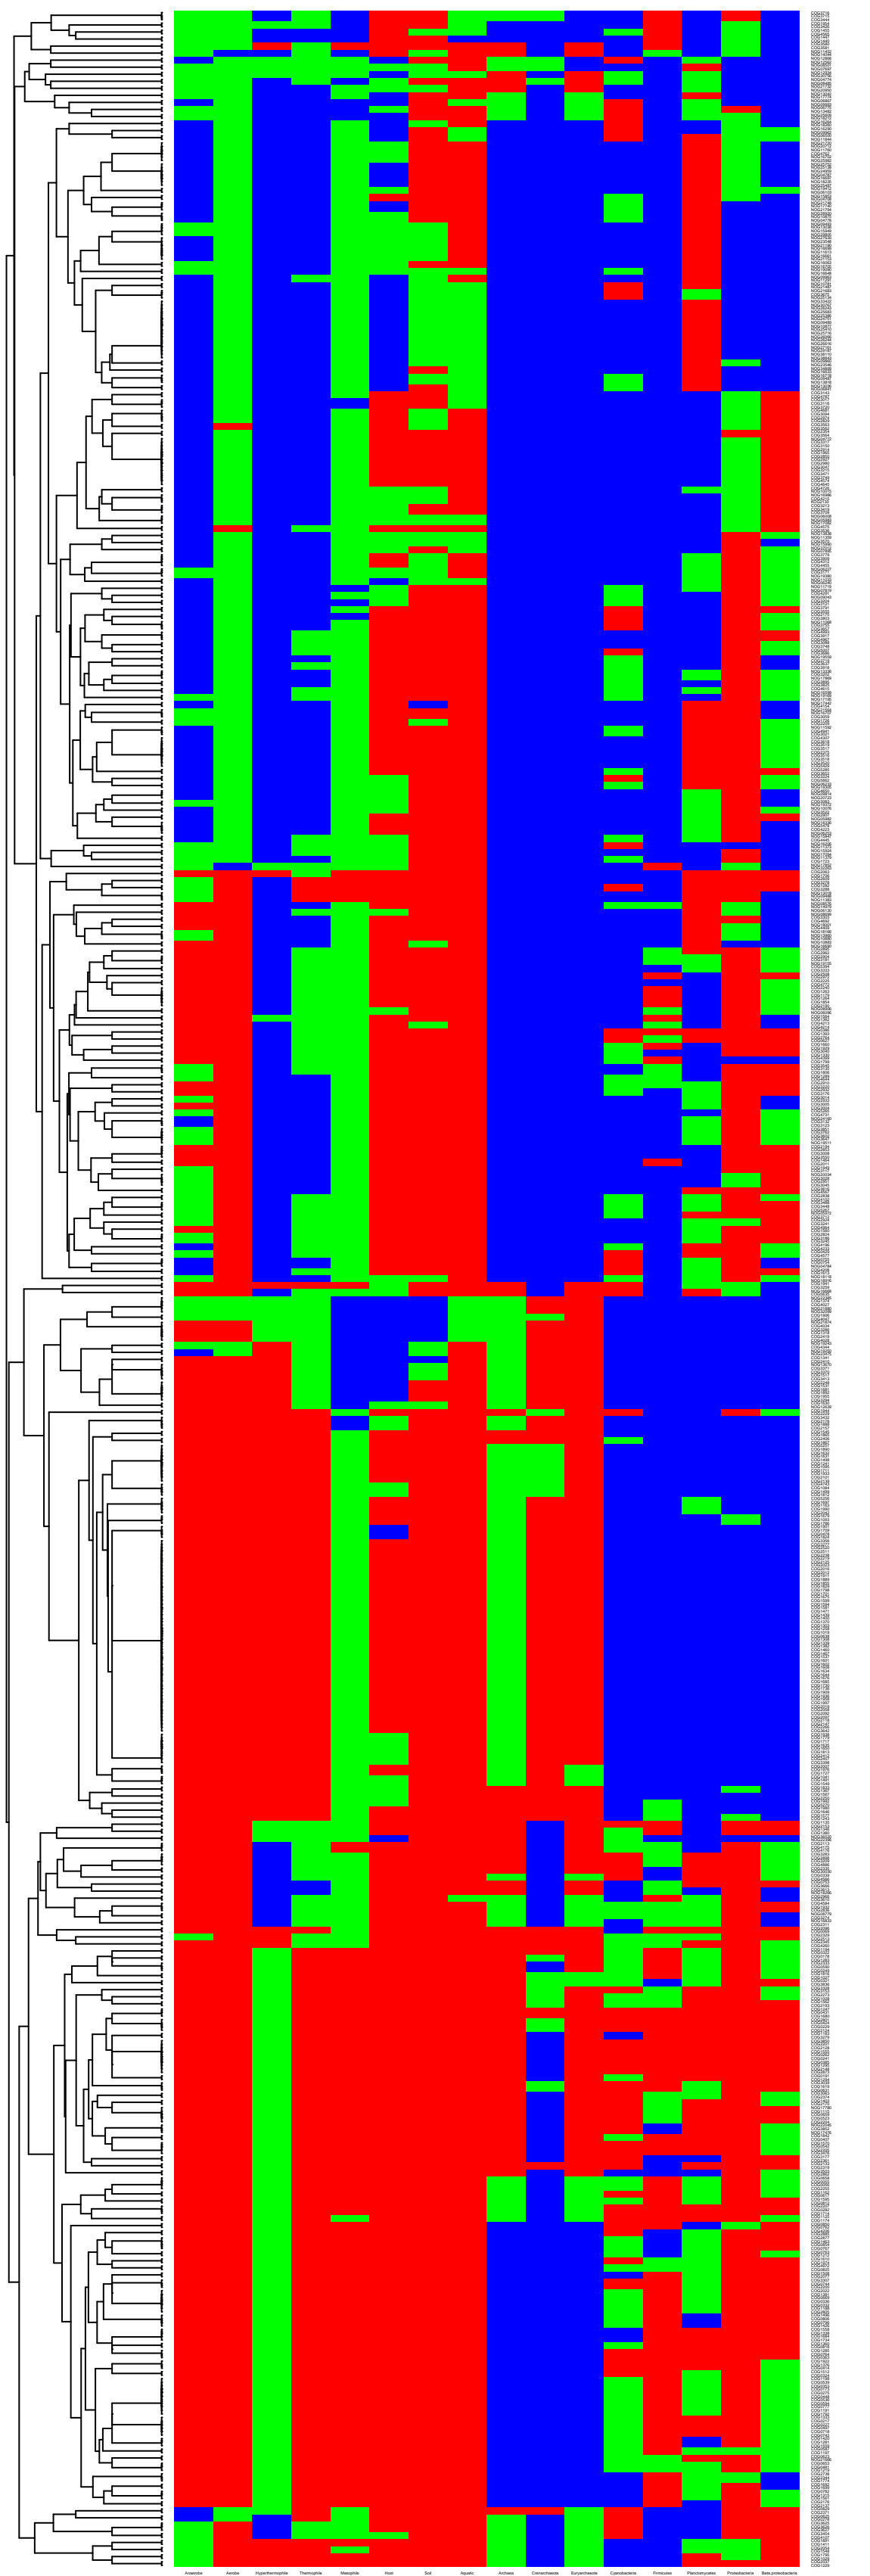

Supplement: msq323_Supplementary_Data.zip [file msq323_Supplementary_Data.zip › mbe-10-0656-File012.pdf]

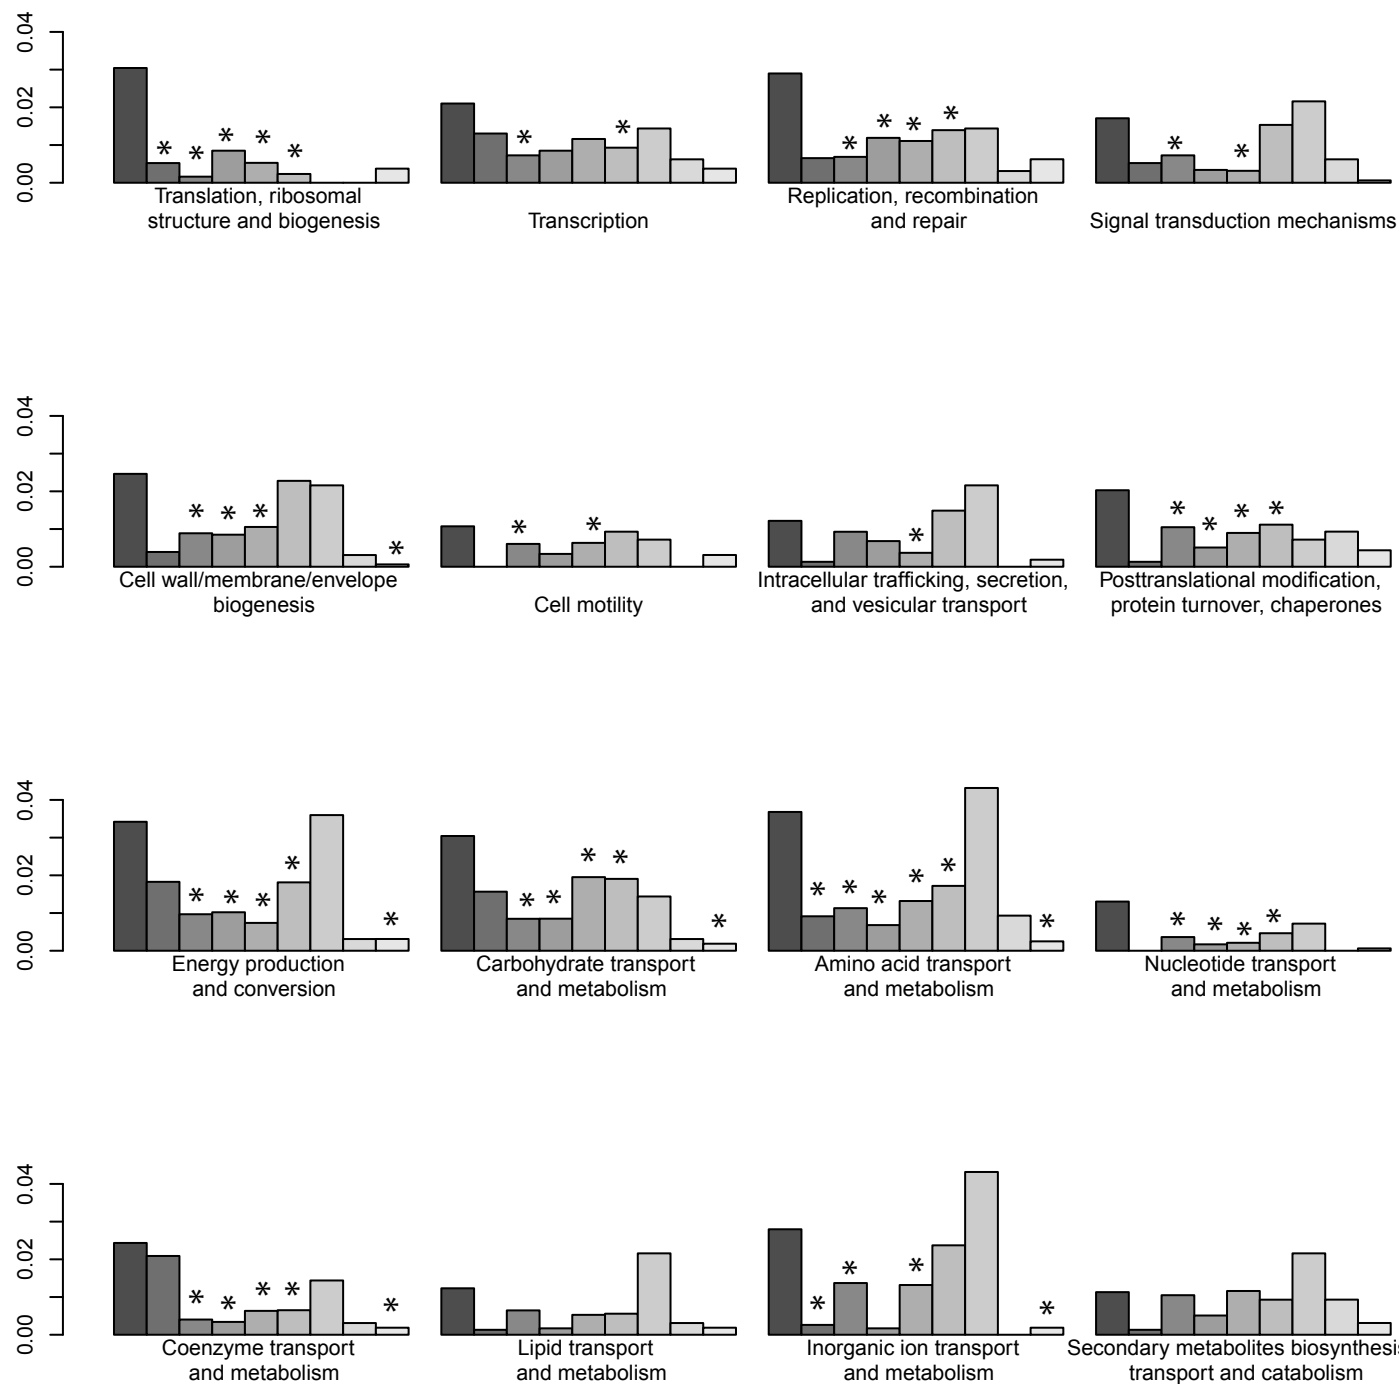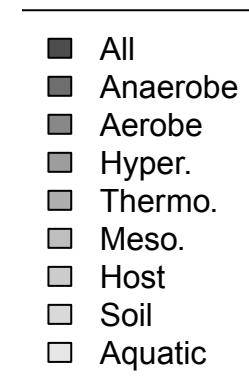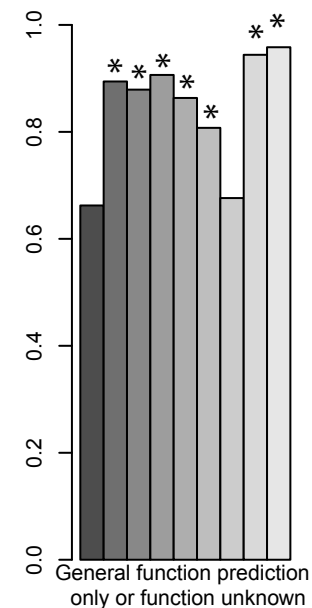

Supplement: msq323_Supplementary_Data.zip [file msq323_Supplementary_Data.zip › mbe-10-0656-File009.pdf]
